1 Krüppel-like factor 4 is required for development and regeneration of germline and yolk cells  
2 from somatic stem cells in planarians

3

4 Melanie Issigonis<sup>1\*</sup>, Akshada B. Redkar<sup>1</sup>, Tania Rozario<sup>1,2</sup>, Umair W. Khan<sup>3,4</sup>, Rosa Mejia-  
5 Sanchez<sup>3,4</sup>, Sylvain W. Lapan<sup>5,6,7,8</sup>, Peter W. Reddien<sup>5,6,7</sup>, Phillip A. Newmark<sup>1,3,4,9,10\*</sup>

6

7 <sup>1</sup>Morgridge Institute for Research, Madison, WI 53715, USA

8 <sup>2</sup>Present address: Department of Genetics, University of Georgia, Athens GA 30602, USA

9 <sup>3</sup>Program in Cellular and Molecular Biology, University of Wisconsin-Madison, Madison, WI  
10 53706, USA

11 <sup>4</sup>Department of Integrative Biology, University of Wisconsin-Madison, Madison, WI 53706,  
12 USA

13 <sup>5</sup>Whitehead Institute for Biomedical Research, Cambridge, MA 02142, USA

14 <sup>6</sup>Department of Biology, MIT, Cambridge, MA 02139, USA

15 <sup>7</sup>Howard Hughes Medical Institute, MIT, Cambridge, MA 02139, USA

16 <sup>8</sup>Present address: Department of Genetics, Harvard Medical School, Boston MA 02115, USA

17 <sup>9</sup>Howard Hughes Medical Institute, University of Wisconsin-Madison, Madison, WI 53715,  
18 USA

19 <sup>10</sup>Lead Contact

20 \*Correspondence: [missigonis@morgridge.org](mailto:missigonis@morgridge.org) (M.I.), [pnewmark@morgridge.org](mailto:pnewmark@morgridge.org) (P.A.N.)

21 **Keywords:**

22 Stem cells, germ cells, yolk cells, niche, germ cell specification, cell differentiation, planarian,  
23 regeneration

24 **Abstract**

25 Sexually reproducing animals segregate their germline from their soma. In addition to gamete-  
26 producing gonads, planarian and parasitic flatworm reproduction relies on yolk-cell-generating  
27 accessory reproductive organs (vitellaria) supporting development of yolkless oocytes. Despite  
28 the importance of vitellaria for flatworm reproduction (and parasite transmission), little is known  
29 about this unique evolutionary innovation. Here we examine reproductive system development in  
30 the planarian *Schmidtea mediterranea*, in which pluripotent stem cells generate both somatic and  
31 germ cell lineages. We show that a homolog of the pluripotency factor Klf4 is expressed in  
32 primordial germ cells, presumptive germline stem cells, and yolk-cell progenitors. *klf4*  
33 knockdown animals fail to specify or maintain germ cells; surprisingly, they also fail to maintain  
34 yolk cells. We find that yolk cells display germ-cell-like attributes and that vitellaria are  
35 structurally analogous to gonads. In addition to identifying a new proliferative cell population in  
36 planarians (yolk cell progenitors) and defining its niche, our work provides evidence supporting  
37 the hypothesis that flatworm germ cells and yolk cells share a common evolutionary origin.

## 38 **Introduction**

39 Sexually reproducing animals consist of two main cell types: germ cells that produce gametes  
40 (eggs and sperm), and somatic cells that make up the remainder of the body. Animal germ cells  
41 are typically specified in either of two ways: by determinate or inductive specification.  
42 Determinate specification results from the segregation of specialized maternal determinants  
43 (germ plasm) at the onset of embryogenesis; those cells receiving germ plasm acquire germ cell  
44 fate. In contrast, inductive specification occurs later in embryogenesis when extrinsic signals  
45 from surrounding tissues instruct competent cells to form germ cells. Determinate specification  
46 has been studied extensively in traditional laboratory models, including *Drosophila*, *C.elegans*,  
47 zebrafish, and frogs [1–4]. Inductive specification is less well characterized, even though it is the  
48 basal and most common mode of germ cell specification in the animal kingdom, and it occurs in  
49 mammals [2,3].

50

51 Irrespective of the mode of germ cell specification, an important commonality exists: once  
52 formed, germ cells are set aside from the soma. The developmental decision to segregate the  
53 germ cell lineage from somatic cells is essential for species continuity; unlike the soma, which  
54 expires each generation, “immortal” germ cells pass on genetic information and serve as a  
55 perpetual link between generations. Many animals (e.g., *Drosophila*, *C. elegans*, and mice)  
56 specify their germ cells (and segregate them from their soma) only once during embryonic  
57 development [1–4]. However, some animals retain the ability to specify new germ cells  
58 throughout their lifetime. Sponges and cnidarians maintain into adulthood multipotent stem cells  
59 that fuel the continuous production of new germ cells while also giving rise to somatic cell  
60 lineages [5–11]. How do these stem cells decide between somatic and germ cell fates?

61  
62 Planarian flatworms can regenerate an entire body from small tissue fragments. Intensive efforts  
63 have been devoted to understanding the mechanisms underlying this regenerative prowess.  
64 Planarian regeneration is driven by pluripotent stem cells called neoblasts that are distributed  
65 throughout the body [12–14]. Planarians can also inform our understanding of germ cell biology:  
66 the neoblasts that give rise to all somatic lineages also give rise to new germ cells. Interestingly,  
67 neoblasts and germ cells express a shared set of conserved “germline genes,” including *piwi*,  
68 *vasa*, *pumilio*, and *tudor* [15,16], which play important roles in neoblast function [17–27]. Like  
69 mammals, planarians undergo inductive germ cell specification [28–30]. However, the  
70 mechanistic basis underlying germ cell specification from “somatic” neoblasts and the factors  
71 involved in adopting somatic versus germ cell fate remain obscure.

72  
73 Here we investigate how new germ cells are specified from neoblasts throughout post-embryonic  
74 development and during regeneration in planarians. We also examine another critical aspect of  
75 the planarian reproductive system: the development of an extensive network of accessory organs  
76 known as vitellaria. Unique among animals, eggs of most flatworms are ectolecithal: yolk is not  
77 present within oocytes themselves, but rather is made by vitellaria that produce specialized yolk  
78 cells (vitelline cells or vitellocytes). Planarians and all parasitic flatworms are characterized by  
79 ectolecithality. However, despite the importance of vitellaria in the life cycle and transmission of  
80 these parasites [31,32], little is known about the development of vitellaria or production of yolk  
81 cells.

82

83 We show that a homolog of the conserved transcription factor *krüppel-like factor 4 (klf4)*, a  
84 critical inducer of pluripotency in mammals [33], is expressed in male and female presumptive  
85 germline stem cells (GSCs) in the planarian *Schmidtea mediterranea*, as well as in a newly  
86 discovered population of mitotically competent yolk cell progenitors. We demonstrate that *klf4* is  
87 required for germ cell specification and that *klf4* knockdown leads to the loss of both germ cell  
88 and yolk cell lineages. We provide evidence that yolk-cell-producing organs in planarians consist  
89 of two distinct cell types: a yolk cell lineage, which is characterized by several germ-cell-like  
90 attributes, and support cells, which sustain yolk cell maintenance and differentiation. Our data  
91 show that planarian vitellaria are structurally analogous to gonads and that yolk cells share  
92 several important features with both somatic neoblasts and germ cells.

93 **Results**

94 ***klf4* is expressed in planarian gonads and yolk-producing accessory organs**

95 In the search for regulators of germ cell fate in planarians, we focused on the conserved  
96 transcription factor KLF4, a key pluripotency factor in mammals [33]. Sexual *S. mediterranea*  
97 are cross-fertilizing, simultaneous hermaphrodites. Using fluorescent in situ hybridization  
98 (FISH) on sexually mature adults, we found that *klf4* mRNA is expressed at high levels within  
99 the ventrally situated ovaries, as well as in cells that are distributed along the medial-posterior  
100 region of each lobe of the cephalic ganglia and appear to be arranged in a field anterior to each  
101 ovary. Sparse *klf4*<sup>+</sup> cells are also located dorsolaterally, where the testes reside (Fig 1A and 1B).  
102 Additionally, *klf4*<sup>+</sup> cells are scattered throughout the ventral parenchyma (the tissue surrounding  
103 the planarian's internal organs), in a pattern reminiscent of vitellaria, the yolk-producing organs  
104 essential for reproduction (Fig 1A and 1B). Thus, this pluripotency-associated transcription  
105 factor is expressed in male and female reproductive tissues.

106

107 ***klf4* expression is restricted to a subset of *nanos*<sup>+</sup> germ cells in ovaries and testes**

108 To analyze gonadal *klf4* expression in more detail, we performed double FISH (dFISH) to detect  
109 *klf4* and the germline marker *nanos* [34] (Fig 1C-1E). Previous work in planarians has shown  
110 that gonadal *nanos* expression is restricted to the early spermatogonia and oogonia in the  
111 outermost layer of testes and ovaries, respectively, which have been interpreted as presumptive  
112 germline stem cells (GSCs) [29,35–37]. In addition to the previously described *nanos*<sup>+</sup> germ  
113 cells found at the ovary periphery, we detected *nanos*<sup>+</sup> cells in the same anterior ovarian fields  
114 described above (Fig 1C); a substantial proportion of *nanos*<sup>+</sup> cells in these fields co-expresses  
115 *klf4* (81%, n=1116 *nanos*<sup>+</sup> cells) and all *klf4*<sup>+</sup> cells are *nanos*<sup>+</sup> (100%, n=908 *klf4*<sup>+</sup> cells). *klf4*

116 expression is similarly restricted to a subset of *nanos*<sup>+</sup> germ cells located at the ovary periphery,  
117 and in *nanos*<sup>+</sup> cells clustered at the boundary between the ovary and its outlet, the tuba (the  
118 anterior-most portion of the oviduct where fertilization occurs) (Fig 1D) (90%, n=1588 *nanos*<sup>+</sup>  
119 cells). All *klf4*<sup>+</sup> cells within and at the base of the ovary co-express *nanos* (100%, n=1423 *klf4*<sup>+</sup>  
120 cells). In the testes of sexually mature adults, *klf4* is also expressed around the periphery, but is  
121 confined to a small subset of *nanos*<sup>+</sup> germ cells (14%, n=10,628 *nanos*<sup>+</sup> cells) (Fig 1E). Similar  
122 to female germ cells, all *klf4*<sup>+</sup> male germ cells express *nanos* (100%, n=1475 *klf4*<sup>+</sup> cells). Our  
123 observations show that in both ovaries and testes, the *nanos*<sup>+</sup> presumptive GSCs are  
124 heterogeneous with respect to *klf4* expression.

125

126 Since only a fraction of *nanos*<sup>+</sup> germ cells express *klf4*, we wondered whether *klf4* expression  
127 represents the earliest stages of *nanos*<sup>+</sup> germ cell development. To answer this question, we  
128 examined the developmental progression of *klf4* and *nanos* expression, starting from the  
129 emergence of primordial germ cells (PGCs) in newly hatched planarians. Previous studies  
130 describing *nanos* expression in hatchlings failed to detect the presence of female (i.e.,  
131 anteroventral) PGCs in planarians until 1 week post-hatching. Male (dorsolateral) *nanos*<sup>+</sup> PGCs  
132 were observed in a minority of planarians during the final stages of embryonic development  
133 (stage 8 embryos) and in 1-day-old hatchlings [34,36]. In contrast to these studies, by FISH, we  
134 were able to detect female *nanos*<sup>+</sup> cells in 100% of 1-day-old hatchlings; however, only a  
135 fraction of these cells expresses the neoblast/germline marker *piwi-1*, (40%, n=1199 *nanos*<sup>+</sup>  
136 cells), indicating that not all anteroventral *nanos*<sup>+</sup> cells are germ cells. While predominantly  
137 expressed in germ cells, *nanos* transcripts have also been detected in a population of eye cells  
138 [36]. Consistent with their ventral location and proximity to the cephalic ganglia, we postulate

139 that *nanos*<sup>+</sup>/*piwi*-*I*<sup>-</sup> cells may represent another somatic cell population, such as neurons. To  
140 determine the proportion of *nanos*<sup>+</sup> PGCs that express *klf4*, we performed triple FISH and found  
141 that 56% of *nanos*<sup>+</sup>/*piwi*-*I*<sup>+</sup> PGCs co-express *klf4* (n=598 *nanos*<sup>+</sup>/*piwi*-*I*<sup>+</sup> cells) (S1A Fig),  
142 indicating that this heterogeneity persists throughout sexual development (72% and 75% of  
143 *nanos*<sup>+</sup>/*piwi*-*I*<sup>+</sup> germ cells are *klf4*<sup>+</sup> in immature, juvenile ovaries and mature, adult ovaries,  
144 respectively) (S1B Fig).

145  
146 Male germ cells are easily observed throughout testis maturation. In hatchlings, all *nanos*<sup>+</sup> cells  
147 distributed dorsolaterally (where testes will develop) co-express *piwi*-*I* (100%, n=517 *nanos*<sup>+</sup>  
148 PGCs). Essentially all *nanos*<sup>+</sup> PGCs also co-express *klf4* (98%, n=189 *nanos*<sup>+</sup> cells) (Fig 2A).  
149 However, as planarians undergo sexual maturation and testis primordia continue to develop, *klf4*  
150 is expressed in an increasingly smaller proportion of the *nanos*<sup>+</sup> population (34%, n=5198  
151 *nanos*<sup>+</sup> cells in juveniles and 14%, n=10,628 *nanos*<sup>+</sup> cells in adults) and there is a marked  
152 increase in *klf4*<sup>-</sup>/*nanos*<sup>+</sup> germ cells (Fig 2B-2C). These data indicate that in hatchlings, newly  
153 specified PGCs express both *klf4* and *nanos*; whereas, during sexual development a *nanos* single-  
154 positive germ cell population emerges and expands. These observations are consistent with a  
155 model in which *klf4*<sup>+</sup>/*nanos*<sup>+</sup> cells represent the most undifferentiated germ cell state (i.e. PGC  
156 and GSC), and *klf4*<sup>-</sup>/*nanos*<sup>+</sup> germ cells are their immediate progeny.

157  
158 Thus far, we have characterized *klf4* expression in the sexual strain of *S. mediterranea*. However,  
159 this species also exists as an obligate asexual biotype, which reproduces exclusively by fission  
160 and does not produce mature gametes or accessory reproductive organs. Although asexual  
161 planarians do not develop functional gametes, they nevertheless specify PGCs in small clusters



162 of *nanos*<sup>+</sup> gonadal primordia. These *nanos*<sup>+</sup> cells do not proliferate or differentiate [34,36,37].  
163 By comparing small (~2 mm) and large (>5 mm) asexuals, we found that the number of *nanos*<sup>+</sup>  
164 germ cells in female (anteroventrally located) and male (dorsolaterally located) primordia  
165 increases as animals grow (S1C and S1D Fig). We examined whether *klf4* expression was  
166 restricted to these early PGCs, and by dFISH we found that *klf4* is co-expressed in the majority  
167 of female *nanos*<sup>+</sup> cells, in similar proportions for both small and large asexuals (91%, n=24  
168 *nanos*<sup>+</sup> cells and 86%, n=213 *nanos*<sup>+</sup> cells, respectively) (S1C and S1D Fig). In contrast, *klf4* is  
169 co-expressed in virtually all male *nanos*<sup>+</sup> cells in small asexuals (98%, n=559 *nanos*<sup>+</sup> cells),  
170 whereas testis primordia in larger animals contain both *klf4*<sup>+</sup>/*nanos*<sup>+</sup> cells and *klf4*<sup>-</sup>/*nanos*<sup>+</sup> cells  
171 (76% and 24% respectively, n=1645 *nanos*<sup>+</sup> cells) (Fig 2D and 2E). Thus, in both growing  
172 asexuals and maturing sexuals, as *nanos*<sup>+</sup> cells in testis primordia increase in number, *klf4*  
173 expression becomes restricted to a subset of these germ cells. This similarity suggests that in the  
174 asexual biotype germ cells can undergo the first step of development – from *klf4*<sup>+</sup>/*nanos*<sup>+</sup> to *klf4*<sup>-</sup>  
175 /*nanos*<sup>+</sup> cells – before reaching a block in differentiation.

176

### 177 ***klf4*-expressing germ cells in ovaries and testes are mitotically active**

178 In many animals, the production of gametes in adulthood is enabled by GSCs. Our findings raise  
179 the possibility that *klf4*-expressing cells are GSCs representing the top of oogonial and  
180 spermatogonial lineages. All GSCs have the ability to undergo self-renewing divisions, which  
181 give rise to differentiating daughter cells while maintaining the stem cell pool. By combining  
182 phospho-Histone H3 (pHH3) immunostaining with *klf4* and *nanos* dFISH, we examined the  
183 mitotic profiles of cells within the germ cell hierarchy and sought to ascertain whether

184 *klf4*<sup>+</sup>/*nanos*<sup>+</sup> cells are competent to divide and, therefore, fulfill a basic criterion of GSC  
185 behavior.

186

187 We found that *klf4*<sup>+</sup>/*nanos*<sup>+</sup> germ cells within the ovarian fields are mitotically active (0.3%,  
188 n=3409 *klf4*<sup>+</sup>/*nanos*<sup>+</sup> cells) (Fig 3A). We also detected proliferation of *klf4*<sup>-</sup>/*nanos*<sup>+</sup> oogonia at  
189 the outer periphery of the ovaries, whereas *nanos*<sup>-</sup> oogonia within the ovaries do not divide  
190 mitotically (Fig 3B). Thus, female germ cells are specified and proliferate within the ovarian  
191 field and/or the ovary periphery, and as oogonia turn off *nanos* expression, they cease to divide  
192 mitotically and differentiate into oocytes.

193

194 Male germ cells actively divide throughout spermatogenesis; spermatogonia undergo 3 rounds of  
195 synchronous mitotic divisions with incomplete cytokinesis to produce 2-, 4-, and 8-cell  
196 spermatogonial cysts connected by intercellular bridges, whose cells differentiate into primary  
197 spermatocytes and divide meiotically to generate 32 spermatids that ultimately transform into  
198 mature sperm [28,38]. We detected pHH3<sup>+</sup>/*klf4*<sup>+</sup>/*nanos*<sup>+</sup> triple-positive cells in testes of both  
199 hatchlings (1%, n=773 *klf4*<sup>+</sup>/*nanos*<sup>+</sup> cells) and adults (0.2%, n=2436 *klf4*<sup>+</sup>/*nanos*<sup>+</sup> cells). In  
200 mature sexuals, mitotic, single-cell spermatogonia and mitotic doublets were observed in *nanos*<sup>+</sup>  
201 germ cells (including *klf4*<sup>+</sup>/*nanos*<sup>+</sup> cells) along the outermost periphery of the testis (Fig 3C and  
202 3D). We also observed *nanos*<sup>-</sup>/pHH3<sup>+</sup> singlets and doublets, which might represent mitotic  
203 *nanos*<sup>-</sup> single-cells or 2-cell spermatogonia (Fig 3D). We never detected *nanos* expression in  
204 pHH3<sup>+</sup> 4- or 8-cell premeiotic spermatogonial cysts, or in 16- or 32-cell meiotic cysts (Fig 3D).  
205 All our observations thus far support a model in which the spermatogonial lineage consists of  
206 *klf4*<sup>+</sup>/*nanos*<sup>+</sup> germ cells at the top of the hierarchy giving rise to *klf4*<sup>-</sup>/*nanos*<sup>+</sup> and subsequently

207 *klf4*<sup>-</sup>/*nanos*<sup>-</sup> single-cell spermatogonia, and that germ cells cease expressing *nanos* once  
208 spermatogonial cystogenic divisions have occurred (Fig 3D).

209

210 ***klf4* is required for female and male gametogenesis and is necessary for PGC specification**

211 Having established *klf4* as the earliest germ cell marker, we asked whether *klf4* is required for  
212 gonadal development. We induced *klf4* RNAi by feeding hatchlings double-stranded RNA  
213 (dsRNA) twice a week for 4-6 weeks – the time normally required to reach sexual maturity. We  
214 examined the effects of *klf4* knockdown on gonadal development by FISH to detect markers of  
215 early germ cells (*nanos*), oocytes (*Cytoplasmic Polyadenylation Element Binding Protein 1*,  
216 *CPEB1*), and gonadal somatic support cells (*ophis*, *Laminin A*, and *dmd1*) (Fig 4A) [35,39,40].  
217 *klf4* knockdown resulted in a significant reduction of early (*nanos*<sup>+</sup>) germ cells in the anterior  
218 ovarian fields and ovaries as well as a loss of mature (*CPEB1*<sup>+</sup>) oocytes (Fig 4B and 4C, S2 Fig).  
219 In extreme cases, ovaries were devoid of mature germ cells. Despite this dramatic loss of germ  
220 cells, *klf4* RNAi ovaries were larger than their control RNAi counterparts, because of a  
221 significant expansion of (*ophis*<sup>+</sup> or *LamaA*<sup>+</sup>) somatic support cells (Fig 4B and 4C). *klf4* RNAi  
222 also led to a loss of germ cells in the testes (Fig 4D and 4E). Agametic *klf4* RNAi testes consist  
223 of *dmd1*<sup>+</sup> somatic cells and have a “collapsed” appearance due to the absence of germ cells (Fig  
224 4D and 4E). Therefore, these data indicate that *klf4* is required for the maintenance of *nanos*<sup>+</sup>  
225 germ cells to sustain proper gametogenesis in both ovaries and testes.

226

227 Is *klf4* also necessary for PGC specification? Since *klf4*<sup>+</sup>/*nanos*<sup>+</sup> PGCs are specified during  
228 embryogenesis and are already present in newborn hatchlings, it is not feasible to induce RNAi  
229 by dsRNA feeding before PGC specification. However, planarians can regenerate germ cells de

230 novo – amputated head fragments comprised solely of somatic cells can inductively specify new  
231 germ cells [34,41]. Therefore, to test the requirement of a gene during PGC specification, one  
232 can feed adult planarians dsRNA to induce RNAi, amputate heads anterior to all reproductive  
233 tissues, and examine regenerating “germ cell-free” head fragments for de novo germ cell  
234 specification (Fig 4F) [35]. Two weeks post-amputation, we found that control head fragments  
235 re-specified *klf4*<sup>+</sup>/*nanos*<sup>+</sup> cells dorsolaterally (Fig 4G) [34]. By contrast, re-specification of PGCs  
236 in *klf4* RNAi or *nanos* RNAi head fragments was significantly impaired, with several head  
237 regenerates lacking germ cells entirely (Fig 4I and 4J). Similarly, *dmd1* RNAi head fragments  
238 fail to specify new *klf4*<sup>+</sup>/*nanos*<sup>+</sup> germ cells during regeneration (Fig 4H), because *dmd1* is  
239 required non-autonomously for germ cell specification [35]. These data indicate that *klf4* and  
240 *nanos* are required cell autonomously for specification of new germ cells from neoblasts and that  
241 *klf4*<sup>+</sup>/*nanos*<sup>+</sup> male PGCs rely on somatic gonadal “niche” cells for their induction.

242

### 243 ***klf4*-expressing cells are present in vitellaria and are progenitors of the yolk cell lineage**

244 Our results indicate that *klf4* is an essential regulator of the establishment and maintenance of the  
245 planarian germ cell lineage. However, this crucial germline regulator is also expressed in  
246 “somatic” organs: the vitellaria (Fig 1B). In *S. mediterranea*, the vitellaria are located ventrally  
247 beneath the testes and connect to the oviducts (Fig 1A). Yolkless oocytes are fertilized in the  
248 anterior-most compartment of the oviduct (the tuba). After fertilization, zygotes are transported  
249 posteriorly through the oviducts to the genital atrium, accumulating thousands of yolk cells along  
250 the way. One or more zygotes and numerous extraembryonic yolk cells are then enclosed within  
251 egg capsules. These capsules are laid through the gonopore, and embryonic development  
252 proceeds for two weeks before newborn hatchlings emerge [28,42–44]. Planarian embryos rely

253 on vitellaria-derived yolk cells for their nutritional needs and development. However, little is  
254 known about these essential reproductive structures, or how yolk cells are made.  
255  
256 To our surprise, *klf4*-expressing cells in the vitellaria also expressed *nanos* (97%, n=1548 *klf4*<sup>+</sup>  
257 cells) (Fig 5A and 5A'). Previously, *nanos* expression had only been detected in a population of  
258 eye cells and in germ cells in testes and ovaries [34,36,37]. Compared to germ cells, *nanos* is  
259 expressed at lower levels in the vitellaria, but is readily detectable due to recent improvements in  
260 ISH sensitivity [45,46]. As in the gonads, *klf4* expression in the vitellaria is restricted to a subset  
261 of *nanos*<sup>+</sup> cells (49%, n=3304 *nanos*<sup>+</sup> cells). Do *klf4*<sup>+</sup>/*nanos*<sup>+</sup> cells represent the progenitor of  
262 planarian yolk cells? To answer this question and to characterize the progression of yolk cell  
263 development, we performed combinatorial dFISH analyses on mature sexual planarians to detect  
264 *klf4* and previously reported vitellaria markers *CPEB1*, *surfactant b*, and *Monosiga brevicollis*  
265 *MXI hypothetical protein (MXI)* [40]. We found that some *klf4*<sup>+</sup> cells co-express *CPEB1* (10%,  
266 n=984 *klf4*<sup>+</sup> cells) and *surfactant b* (9%, n=822 *klf4*<sup>+</sup> cells), but not *MXI* (0%, n=1094 *klf4*<sup>+</sup>  
267 cells) (Fig 5B–5D and 5B'–5D'). These observations suggest that *klf4* expression marks the  
268 earliest yolk cells and that *CPEB1* and *surfactant b* expression precede *MXI* expression in the  
269 yolk cell lineage. Indeed, most *CPEB1*<sup>+</sup> cells co-express *surfactant b* (95%, n=1752 *CPEB1*<sup>+</sup>  
270 cells) but a much smaller fraction co-express *MXI* (36%, n=4334 *CPEB1*<sup>+</sup> cells) (S3A, S3B,  
271 S3A' and S3B' Fig). A large fraction of *surfactant b*-expressing cells are also *MXI*<sup>+</sup> (70%,  
272 n=8057 *surfactant b*<sup>+</sup> cells), and essentially all *MXI*<sup>+</sup> cells co-express *surfactant b* (99 %,  
273 n=5840 *MXI*<sup>+</sup> cells) (S3C and S3C' Fig). The progression of yolk cell development is also  
274 marked by changes in cell morphology: *klf4*<sup>+</sup> cells are small and have very little cytoplasm,  
275 unlike the large, yolk-filled *surfactant b*<sup>+</sup> and *MXI*<sup>+</sup> cells of the vitellaria (Fig 5C' and 5D').

276 Taken together, these results are consistent with a model in which *klf4*<sup>+</sup>/*nanos*<sup>+</sup> cells define the  
277 origin of the yolk cell lineage and that *nanos*, *CPEB1*, *surfactant b*, and *MXI* are expressed in a  
278 partially overlapping, stepwise fashion as yolk cells differentiate (Fig 5E).

279

280 To characterize the developmental origins of the vitellaria, we examined the expression patterns  
281 of *klf4*, *nanos*, *CPEB1*, *surfactant b*, and *MXI* by dFISH at two earlier stages of planarian  
282 development. One-week-old hatchlings did not express any of these yolk cell markers in the  
283 presumptive vitellarial regions (n=0/40 hatchlings) (S4A Fig). Later in development, 100% of 2-  
284 to 3-week-old juveniles (n=26/26 planarians) possessed ventrally located *klf4*<sup>+</sup> cells in the region  
285 where vitellaria form (S4B Fig). Additionally, all juvenile worms expressed *nanos* (n=7/7),  
286 *CPEB1* (n=6/6) and *surfactant b* (n=7/7) in their vitellaria, but few expressed *MXI* (n=2/6) (S4B  
287 Fig). Therefore, *klf4*<sup>+</sup>/*nanos*<sup>+</sup> yolk-cell progenitors are specified post-embryonically (after  
288 hatchlings have developed into juvenile planarians), and these cells continue to differentiate into  
289 *CPEB1*<sup>+</sup>, *surfactant b*<sup>+</sup>, and ultimately *MXI*<sup>+</sup> yolk cells as planarians mature into adults.

290

291 Is *klf4* also required for the development of the yolk cell lineage? We induced *klf4* RNAi  
292 beginning in hatchlings (8-12 feedings) and examined the effects on early and late yolk cells by  
293 FISH to detect *nanos* and *MXI*. Knockdown of *klf4* resulted in a dramatic reduction of all yolk  
294 cells (Fig 5F and 5G), confirming the requirement for *klf4* in the development of the yolk cell  
295 lineage and suggesting that this ventral *klf4*<sup>+</sup>/*nanos*<sup>+</sup> population is indeed the progenitor of yolk  
296 cells.

297

## 298 **Yolk cells share features with neoblasts and germ cells**

299 Our results suggest that *klf4* marks the top of both germ cell and yolk cell lineages. Yolk cells are  
300 technically somatic since they do not generate gametes, yet it has long been postulated that  
301 flatworm yolk cells may share an evolutionary origin with oocytes (the female germline) [44].  
302 One hypothesis is that yolk cells were derived from germ cells in the course of evolution and that  
303 a split/divergence between these two cell types may have occurred in the common ancestor of all  
304 ectolecithal flatworms [47–49]. As we found that both yolk cells and the female germline share  
305 *klf4* and *nanos* expression, we wondered whether yolk cells share other germ cell characteristics,  
306 such as expression of *piwi-1* and *germinal histone H4 (gH4)* (S5A Fig), two transcripts thought  
307 to be expressed exclusively in neoblasts and germ cells [34,43,50–53]. By dFISH, we found that  
308 the vast majority of *klf4*<sup>+</sup> cells in the vitellaria are also *piwi-1*<sup>+</sup> (94%, n=789 *klf4*<sup>+</sup> cells) and  
309 *gH4*<sup>+</sup> (98%, n=399 *klf4*<sup>+</sup> cells) (Fig 6A and 6E, S5B and S5C Fig). Unlike other somatic tissues,  
310 in which *piwi-1* mRNA is degraded during differentiation [26], *piwi-1* expression perdures  
311 during yolk cell differentiation and is still detected in most *CPEB1*<sup>+</sup> cells (80%, n=2801 *CPEB1*<sup>+</sup>  
312 cells) and *surfactant b*<sup>+</sup> cells (55%, n=2136 *surfactant b*<sup>+</sup> cells), but not in *MXI*<sup>+</sup> cells (0%,  
313 n=284 *MXI*<sup>+</sup> cells) (Fig 6B–6D). Similarly, *gH4* is co-expressed in most *surfactant b*<sup>+</sup> cells  
314 (64%, n=4410 *surfactant b*<sup>+</sup> cells) (Fig 6F and S5D Fig). Thus, similar to the germ cell lineages  
315 in testes and ovaries, *piwi-1* and *gH4* expression persist in differentiating yolk cells.  
316  
317 In addition to the retention of germ cell features in yolk cells, these cells are mitotically active.  
318 We detected PHH3 staining in *klf4*<sup>+</sup>/*nanos*<sup>+</sup> as well as *klf4*<sup>-</sup>/*nanos*<sup>+</sup> yolk cells (Fig 6G). Taken  
319 together, these results show that even though yolk cells do not give rise to gametes (and are

320 therefore not germ cells), they do exhibit several germ cell characteristics, including expression  
321 of the germline markers *nanos*, *piwi-1*, and *gH4*, and the capacity to proliferate.

322

### 323 **Vitellaria contain distinct cell types: a yolk cell lineage and non-yolk support cells**

324 Gonads are not composed solely of germ cells: they also contain somatic support cells (or niche  
325 cells) that govern germ cell behavior. Thus, we asked whether vitellaria contain non-yolk  
326 vitelline support cells and whether they could play a niche-like role in maintaining the  
327 *klf4*<sup>+</sup>/*nanos*<sup>+</sup> stem/progenitor population for sustaining the yolk cell lineage. Previously,  
328 expression of the orphan G-protein coupled receptor *ophis*, a somatic gonadal cell marker, was  
329 detected in the vitellaria, but its role there was not characterized [39]. We found that in mature  
330 sexual planarians, the vitellaria are arranged in an extensively branched network containing two  
331 populations of *ophis*-expressing cells: *ophis*<sup>high</sup> cells, which express *ophis* predominantly in the  
332 nucleus, and *ophis*<sup>low</sup> cells with weak signal throughout the cell (Fig 7A). *ophis*<sup>+</sup> cells are  
333 interspersed throughout the vitellaria, similar to *klf4*<sup>+</sup> cells (S6A-S6D Fig). *klf4*<sup>+</sup> cells are tightly  
334 juxtaposed with *ophis*<sup>high</sup> cells, however, they never co-express high levels of *ophis* (0% *klf4*<sup>+</sup>  
335 cells are *ophis*<sup>high</sup>, n=368 *klf4*<sup>+</sup> cells) (Fig 7A). On the other hand, a large fraction of *klf4*<sup>+</sup> cells  
336 are *ophis*<sup>low</sup> (60% *klf4*<sup>+</sup> cells are *ophis*<sup>low</sup>, n=368 *klf4*<sup>+</sup> cells). These results led us to hypothesize  
337 that *ophis*<sup>low</sup> versus *ophis*<sup>high</sup> cells represent two distinct classes of cells in the vitellaria: *ophis*<sup>low</sup>  
338 cells constitute the yolk cell lineage proper and *ophis*<sup>high</sup> cells are support cells that closely  
339 associate with the yolk cells and comprise the remaining structure of the vitellaria.

340

341 If the *ophis*<sup>low</sup> population represents the yolk cell lineage of which *klf4*<sup>+</sup> cells are the precursors,  
342 then we would expect *klf4*<sup>-</sup>/*ophis*<sup>low</sup> cells to express markers of progressive yolk cell



343 differentiation. Consistent with this idea, almost all *CPEBI*<sup>+</sup>, *surfactant b*<sup>+</sup>, and *MXI*<sup>+</sup> cells co-  
344 express low levels of nuclear and cytoplasmic *ophis* mRNA (98%, n=2914 *CPEBI*<sup>+</sup> cells; 100%  
345 n=2015 *surfactant b*<sup>+</sup> cells; 96%, n=256 *MXI*<sup>+</sup> cells) (Fig 7B-7E). On the other hand, high levels  
346 of nuclear *ophis* were rare in *CPEBI*<sup>+</sup>, *surfactant b*<sup>+</sup>, and *MXI*<sup>+</sup> cells (2%, n=2914 *CPEBI*<sup>+</sup>  
347 cells; 0%, n=2015 *surfactant b*<sup>+</sup> cells; 1%, n=256 *MXI*<sup>+</sup> cells). These results indicate that  
348 *ophis*<sup>low</sup> expression emerges in a subset of *klf4*<sup>+</sup> yolk cell progenitors and subsequently persists  
349 as these cells differentiate (Fig 7H), whereas *ophis*<sup>high</sup> expression defines a distinct cell type in  
350 the vitellaria.

351  
352 In agreement with the model that *ophis*<sup>high</sup> cells constitute a separate cell lineage, the majority of  
353 these cells do not express yolk cell markers (0%, n=784 *ophis*<sup>high</sup> cells are *klf4*<sup>+</sup>; 12%, n=519  
354 *ophis*<sup>high</sup> cells are *CPEBI*<sup>+</sup>; 15%, n=573 *ophis*<sup>high</sup> cells are *surfactant b*<sup>+</sup>; 1%, n=521 *ophis*<sup>high</sup>  
355 cells are *MXI*<sup>+</sup>). Instead, most *ophis*<sup>high</sup> cells express *Laminin A (LamA)* (81%, n=440 *ophis*<sup>high</sup>  
356 cells are *LamA*<sup>+</sup>) (Fig 7F), a gene expressed in the vitellaria (S6E and S6F Fig) as well as in  
357 somatic gonadal cells in the testes and ovaries (S6G Fig). This result corroborates the finding  
358 that *ophis*<sup>high</sup> expression marks support cells within the vitellaria. Notably, *klf4* and *LamA* are  
359 never co-expressed within the vitellaria (0%, n=540 *klf4*<sup>+</sup> cells, 0%, n=867 *LamA*<sup>+</sup> cells) (Fig  
360 7G). Taken together, our data suggest that two cell lineages exist in the vitellaria: the yolk cell  
361 lineage (*ophis*<sup>low</sup>) which includes *klf4*<sup>+</sup> cells, and a second population made up of  
362 *ophis*<sup>high</sup>/*LamA*<sup>+</sup> cells. It was previously reported that *ophis* transcript was expressed in the  
363 somatic gonadal cells of the ovary [39]. In addition to this expression pattern, we detect low  
364 levels of *ophis* expression in the oogonial lineage, similar to yolk cells (S6H Fig). The

365 dichotomy between *ophis*<sup>low</sup> versus *ophis*<sup>high</sup> expression in the germline and somatic lineages of  
366 the ovary is reminiscent of what we observed in the two vitellarial lineages.

367

### 368 **Gonadal niche factor *ophis* is required to maintain the yolk cell lineage**

369 Previous work has shown that *ophis* is required for proper development of both male and female  
370 gonads in planarians [39]. To address whether *ophis* is a shared molecular regulator of gonads  
371 and vitellaria, we performed RNAi knockdown of *ophis* in hatchlings until they reached sexual  
372 maturity and analyzed the effects on the vitellaria by FISH (Fig 8A-8C). *ophis* knockdown  
373 resulted in a dramatic loss of the *LamA*<sup>+</sup> cells throughout the vitellaria, but did not affect *LamA*  
374 expression within the gut (Fig 8A). We also observed a significant reduction of *klf4*<sup>+</sup> cells and  
375 complete loss of mature *MXI*<sup>+</sup> yolk cells in *ophis* RNAi animals (Fig 8B and 8C). Although we  
376 cannot distinguish the functions of *ophis*<sup>high</sup> from *ophis*<sup>low</sup> cells in the vitellaria by available  
377 techniques in planarians, it is clear from our data that *ophis* is essential for the maintenance of  
378 support cells (*ophis*<sup>high</sup>/*LamA*<sup>+</sup>) in the vitellaria and is required (perhaps through the action of  
379 support cells) for the maintenance and differentiation of *klf4*<sup>+</sup> yolk cell progenitors.

380 **Discussion**

381 Most animals specify PGCs and segregate them from somatic tissues only once, early in  
382 development. Within developed gonads, germ cells are generated from GSCs for the  
383 reproductive life of the organism. Planarians also specify PGCs in development but are able to  
384 continuously regenerate new germ cells from pluripotent stem cells throughout their lifetime.  
385 Whether or not planarians also maintain GSCs is less clear, especially since theoretically they  
386 could reseed gonads with new germ cells from their somatic stem cells (neoblasts) throughout  
387 adulthood. Characterizing the regulators that define planarian germ cells and function in their  
388 specification and maintenance will reveal important clues for understanding the remarkable  
389 ability of planarians to faithfully regenerate germ cells.

390

391 Elucidating early stages of the germ cell lineage

392 We found that *klf4* expression marks the earliest/least differentiated germ cell state in planarians.  
393 Early hatchlings specify PGCs that co-express *klf4* and *nanos* dorsolaterally, where adult testes  
394 will ultimately reside. Thus, male PGCs likely do not undergo extensive migration to the somatic  
395 gonad. Instead, they are likely to be specified along with *dmdl*-expressing somatic gonadal niche  
396 cells, and then differentiate in situ as the testis grows/elaborates during reproductive maturation.  
397 As hatchlings develop into juveniles, testis primordia grow in size and two successive  
398 populations of *klf4*<sup>-</sup> germ cells arise (*nanos*<sup>+</sup> and *nanos*<sup>-</sup>). These populations emerge as testes  
399 develop, strongly suggesting that they represent the first step in germ cell differentiation and that  
400 cessation of *klf4* expression may be required for germ cell differentiation to proceed.

401

402 We observed that *klf4* is expressed in virtually all *nanos*<sup>+</sup> cells in early hatchlings, and then  
403 becomes increasingly restricted to a smaller subset of *nanos*<sup>+</sup> cells as planarians sexually mature.  
404 The restriction of *klf4* expression to a subset of *nanos*<sup>+</sup> germ cells holds true in asexual  
405 planarians as well, where the number of germ cells in both gonadal primordia increases as  
406 animals grow (Sato et al., 2006). Small asexual planarians express *klf4* in almost all *nanos*<sup>+</sup> germ  
407 cells, whereas larger asexuals have proportionally fewer double-positive cells in their testis  
408 primordia. Our results refine the stage at which development arrests in asexuals: in growing  
409 asexuals, *klf4*<sup>+</sup>/*nanos*<sup>+</sup> cells can only carry out the first step of development (into *klf4*<sup>-</sup>/*nanos*<sup>+</sup>  
410 cells), further reinforcing the idea that the germ cell lineage progresses in this direction.

411  
412 Additionally, we have shown that *klf4* is required for the specification of germ cells. RNAi  
413 knockdown of *klf4* in soma-only head fragments results in regenerated animals that do not re-  
414 specify *nanos*<sup>+</sup> germ cells, even though new testis somatic gonadal support cells (*dmd1*<sup>+</sup>) that  
415 form the niche are made. Our data indicate that *klf4* is required cell autonomously for the de  
416 novo specification of germ cells. Taken together, these observations support a model in which  
417 *klf4* expression marks the top of the germ cell hierarchy and that expression of *klf4* is required  
418 for the acquisition of germ cell fate.

419  
420 Although animals specify their germline in different ways (preformation vs induction), a  
421 conserved feature of newly specified PGCs is the repression of somatic differentiation  
422 transcriptional programs. Posttranscriptional regulation through the action of conserved  
423 germline-specific RNA regulators such as *vasa*, *pumilio*, *nanos*, and *piwi* plays an outsized role  
424 in controlling germ cell fate, survival, proliferation, and differentiation. Germ cell fate

425 specification at the transcriptional level is less well understood. During mouse embryogenesis,  
426 PGCs are specified from pluripotent epiblast cells by BMP signals from the extraembryonic  
427 ectoderm and the visceral endoderm through the action of Smads [54–57]. Critical regulators of  
428 PGC specification have been described, including transcription factor genes *Prdm1* (which  
429 encodes BLIMP1) and *Prdm14* [58–65]. A key role of BLIMP1 is to induce expression of  
430 *Tcfap2c* (which encodes the transcription factor AP2 $\gamma$ ) [64,66,67], and together, BLIMP1,  
431 PRDM14, and AP2 $\gamma$  are important for initiating PGC specification, repressing expression of  
432 somatic genes, activating expression of PGC-specific genes, and driving epigenetic reprogramming  
433 [62,66–69].

434

435 Recent studies on emerging models have shown that some of the molecular mechanisms  
436 regulating PGC specification may be conserved. In the cricket *Gryllus bimaculatus*, PGCs are  
437 specified in response to BMP signaling via the action of Blimp-1 [70,71]. Additionally, in the  
438 cnidarian *Hydractinia symbiolongicarpus*, a homolog of AP2 is an inducer of germ cell fate [11].  
439 Although the inductive cues that control germ cell fate in *S. mediterranea* remain to be  
440 identified, here we identify a transcription factor, Klf4, required for germ cell specification. It is  
441 worth noting that Klf4 is a crucial pluripotency factor in mammals. Furthermore, pluripotency  
442 genes *Oct4*, *Sox2*, and *Nanog* are expressed in mouse PGCs [72], reflecting the importance of  
443 maintaining pluripotency in germ cells. Therefore, future identification of Klf4 targets in *S.*  
444 *mediterranea* will not only elucidate the transcriptional program required for promoting germ  
445 cell fate from pluripotent neoblasts but may also provide important clues into how germline  
446 pluripotency is maintained.

447

448 Are *klf4*-expressing cells true stem cells?

449 GSCs are characterized by the ability to undergo self-renewing divisions in which one daughter  
450 remains a stem cell and the other differentiates. Consistent with the hypothesis that *klf4*<sup>+</sup> cells are  
451 GSCs, *klf4*-expressing cells in both testes and ovaries are mitotically active throughout post-  
452 embryonic development. However, technical limitations precluded us from testing whether  
453 mitotic *klf4*<sup>+</sup> cells undergo self-renewing divisions. Alternatively, it is possible that no resident  
454 GSC population exists within the gonads themselves; instead neoblasts residing in the gonad-  
455 adjacent parenchyma may be continually specified as new germ cells that then differentiate  
456 directly without self-renewing. Either way, dFISH experiments with *klf4* and *nanos* have  
457 uncovered heterogeneity within the early male and female germ cell compartments. Furthermore,  
458 developmental timeline experiments have allowed us to define the early germ cell lineage with  
459 *klf4*<sup>+</sup>/*nanos*<sup>+</sup> germ cells at the top of the hierarchy. Prolonged inhibition of *klf4* via RNAi during  
460 post-embryonic development and sexual maturation led to a dramatic loss of early germ cells in  
461 both testes and ovaries, resulting in agametic gonads in some animals. This result suggests that  
462 *klf4* is required for the maintenance of GSCs (or germ cell lineal progenitors) to sustain  
463 gametogenesis. Future experiments will explore whether *klf4*<sup>+</sup>/*nanos*<sup>+</sup> cells represent true GSCs  
464 and whether this newly defined lineage progresses in a unidirectional manner, or if all *nanos*-  
465 expressing cells retain GSC-like potential.

466 Bidirectional soma-germ cell communication in the ovary

467 Intriguingly, loss of germ cells in the ovary led to a corresponding increase in ovarian somatic  
468 gonadal cells (*ophis*<sup>+</sup> and *LamA*<sup>+</sup>). This result reveals that soma-germline communication in the  
469 planarian ovary is bidirectional. The importance of somatic support cells for germ cell  
470 development is undisputed. However, far less is known about how germ cells signal back to their

471 somatic microenvironment [73–75]. In planarians, somatic cell expansion in the ovary in  
472 response to germ cell loss suggests that somatic and germ cell numbers are coordinated via a  
473 feedback mechanism. What signals regulate this feedback loop? How does the planarian ovary  
474 balance somatic and germ cell numbers to achieve an equilibrium between these two cell types?  
475 The planarian ovary presents a unique opportunity to investigate the mechanisms involved in  
476 soma-germline coordination during development, homeostasis, and regeneration.

477

478 While both gonads contain *klf4*<sup>+</sup>/*nanos*<sup>+</sup> putative GSCs, there is also a population of these cells  
479 anterior to each ovary. They may be germ cell progenitors that migrate posteriorly and enter the  
480 ovary, where they then give rise to *nanos*<sup>-</sup> oogonia/oocytes. Alternatively, *klf4*<sup>+</sup>/*nanos*<sup>+</sup> cells  
481 may be specified in a permissive zone along the medial-posterior regions of the cephalic ganglia,  
482 but only the posterior-most germ cells located at the base of the brain (where the somatic gonad  
483 is located) are then able to associate with somatic gonadal cells and consequently instructed to  
484 differentiate. Until we are able to specifically ablate this population, its contribution to the ovary  
485 (or lack thereof) will remain mysterious.

486

#### 487 A shared evolutionary origin of germ cells and yolk cells?

488 A unique reproductive feature of flatworms is ectolecithality: a developmental novelty in which  
489 oocytes develop with little/no yolk while specialized yolk cells are produced ectopically. For  
490 embryogenesis to occur, the fertilized oocyte and numerous yolk cells must be deposited together  
491 in egg capsules. As yolk cells are the sole source of embryonic nutrients, ectolecithality has led  
492 to marked evolutionary and functional consequences on embryonic development. For example,

493 yolkless embryos develop temporary organs (e.g., embryonic pharynx, primitive gut) that  
494 facilitate uptake of maternally provided yolk/nutrients early in embryogenesis [76].  
495  
496 Recent phylogenetic analyses have shed light on the origin of ectolecithality in flatworms. One  
497 group of flatworms produces oocytes and yolk cells within a single organ (the germovitelarium);  
498 another group partitions egg- and yolk cell-production into two distinct organs (the  
499 germarium/ovary and vitellaria). This latter group is known as Euneoophora and includes  
500 planarians and parasitic flatworms. Although traditional phylogenies grouped both types of  
501 ectolecithal worms together, recent phylogenies suggest that they evolved independently [47–  
502 49]. Thus, the ectolecithal common ancestor of all euneoophorans likely evolved from more  
503 primitive endolecithal (“yolky egg”-producing) flatworms [48,49], consistent with a model in  
504 which yolk cells in ectolecithal flatworms evolved from ancestral “yolky” germ cells. These  
505 phylogenetic studies recognized that molecular similarities between germ cell and yolk cell  
506 precursors would lend further support to the shared evolutionary origin hypothesis [47–49]. Here  
507 we provide molecular and developmental evidence suggesting that yolk cells and germ cells are  
508 homologous. Even though yolk cells do not produce gametes and, therefore, are not de facto  
509 germ cells, they share several molecular and cellular characteristics in common with germ cells  
510 (Fig 8D). Yolk cells express both *klf4* and *nanos*: two markers that define male and female germ  
511 cell lineages. Similarly to testes and ovaries, *klf4* expression in vitellaria is restricted to a subset  
512 of *nanos*<sup>+</sup> yolk cells, suggesting that *klf4*<sup>+</sup>/*nanos*<sup>+</sup> cells define the lineal progenitors of yolk cells.  
513 We also find that yolk cells express *piwi-1* and *gH4*, which until this work, were reported to be  
514 expressed exclusively in neoblasts and germ cells. *piwi-1* and *gH4* are highly expressed in  
515 neoblasts but downregulated in their immediate somatic progeny. In contrast to the soma, but



516 similar to *piwi-1* and *gH4* expression in male and female germ cell lineages, expression of these  
517 genes is sustained in differentiating (*klf4*<sup>-</sup>/*nanos*<sup>-</sup>) yolk cells. This sustained expression of  
518 neoblast/germ cell markers provides another molecular similarity between germ cells and yolk  
519 cells.

520

521 Surprisingly, we observed mitosis in yolk cells. Previously, the only planarian somatic cells  
522 thought to have mitotic activity were neoblasts. Although yolk cells are technically somatic, our  
523 results clearly indicate that like germ cells, a subset of yolk cells is mitotically competent. The  
524 observation that both *klf4*<sup>+</sup>/*nanos*<sup>+</sup> and *klf4*<sup>-</sup>/*nanos*<sup>+</sup> yolk cells divide indicates that mitotic ability  
525 is not limited to the earliest progenitor in the yolk cell lineage. Are pHH3<sup>+</sup>/*klf4*<sup>+</sup>/*nanos*<sup>+</sup> cells  
526 undergoing self-renewing divisions? Do *piwi-1*<sup>+</sup>/*klf4*<sup>+</sup>/*nanos*<sup>+</sup> cells represent a new stem cell  
527 population in planarians? With the sole exception of planarian gonads, no other planarian organ  
528 contains a resident stem cell (or dividing cell) population. Instead, dividing neoblasts in the  
529 parenchyma are the only source of new differentiated somatic cells, which then integrate into  
530 existing tissues. The planarian vitellarium provides an intriguing case study to understand the  
531 regulation of stem cell populations in planarians.

532

533 These similarities between the female germ cell and yolk cell lineages prompted us to ask  
534 whether ovaries and vitellaria also share structural features. For example, is there a distinct  
535 lineage of somatic support cells that act as a niche? Gonads are typified by the presence of  
536 somatic support cells that associate intimately with germ cells and play crucial roles in their  
537 development. We discovered that in addition to the yolk cells, vitellaria contain a second  
538 population of cells (*ophis*<sup>high</sup>/*LamA*<sup>+</sup>) with long fingerlike projections that contact all stages of

539 the yolk cell lineage. Both *ophis* and *LamA* are also expressed in the somatic gonadal cells of the  
540 ovary. *ophis* RNAi leads to loss of *LamA*<sup>+</sup> vitellaria cells, a dramatic decrease in *klf4*<sup>+</sup> yolk cell  
541 progenitors, and a complete failure of vitellogenesis, suggesting that the *ophis*<sup>high</sup>/*LamA*<sup>+</sup> cells  
542 could function as a niche required to maintain the yolk cell stem/progenitor population. Because  
543 a significant number of *klf4*<sup>+</sup> yolk cell progenitors co-express low levels of *ophis*, we cannot yet  
544 distinguish definitively between a cell-autonomous versus non-autonomous role for *ophis* in yolk  
545 cell development. However, since *ophis* RNAi results in a dramatic loss of *klf4*<sup>+</sup> cells that far  
546 outnumbers the fraction of *klf4*<sup>+</sup> cells that co-express *ophis* (60%), we favor the model that *ophis*  
547 acts non-autonomously in the maintenance of *klf4*<sup>+</sup>/*ophis*<sup>-</sup> yolk cells.

548

549 Comparative analyses of gametogenesis and vitellogenesis in *S. mediterranea* have allowed us to  
550 investigate the biological phenomenon of ectolecithality and to better understand its origin in  
551 Platyhelminthes. Interestingly, *nanos* expression has been detected in early yolk cells of the  
552 parasitic flatworm *Schistosoma mansoni* [32]. Since *all* parasitic platyhelminthes (trematodes,  
553 cestodes, and monogeneans) are characterized by the presence of ectolecithality, and depend on  
554 sexual reproduction to successfully propagate, the vitellaria may provide an effective anti-  
555 helminthic target. Thus, the experimental accessibility of planarians provides an opportunity to  
556 dissect the mechanisms regulating vitellaria development, with the potential to help in the fight  
557 against their parasitic cousins.

558

## 559 Conclusion

560 This study demonstrates the functional requirement for *klf4* in germ cell specification and  
561 maintenance in planarians, and provides evidence that *klf4* expression marks the top of the germ

562 cell lineage. Additionally, our results suggest that *klf4* is a pivotal intrinsic regulator not only of  
563 germ cells, but also of yolk cells in a somatic reproductive structure, the vitellaria. Furthermore,  
564 we identify a new population of mitotically competent yolk cell progenitors and characterize  
565 their niche. Together, these results show that planarian germ cells and somatic yolk cells exhibit  
566 a remarkable degree of similarity, supporting the hypothesis that these two lineages share an  
567 evolutionary origin.

## 568 **Materials and Methods**

### 569 **Planarian culture**

570 Sexual *S. mediterranea* [52] were maintained in 0.75X Montjuïc salts [77] at 16-18°C. Asexual  
571 *S. mediterranea* (clonal strain CIW4) [78] were maintained in 1X Montjuïc salts at 20-22°C.  
572 Planarians were starved for one week before experimentation.

573

### 574 **Cloning**

575 Target genes were cloned by PCR amplification of cDNA generated from RNA extracted from  
576 adult sexual *S. mediterranea*. Gene-specific PCR amplicons were ligated into the pJC53.2 vector  
577 via TA-cloning as previously described [51]. Anti-sense riboprobes were generated by in vitro  
578 transcription reactions with T3 or SP6 RNA polymerases [46]. dsRNA was generated using T7  
579 RNA polymerase [79]. Sequences used for probes and dsRNA are found in S1 Table.

580

### 581 **In situ hybridization**

582 FISH protocols were performed as previously described [45,46] with the following  
583 modifications. Asexual and sexual hatchling/sexual adult planarians were killed in 7.5 % N-  
584 acetyl-L-cysteine in 1X PBS for 5/10 minutes; fixed in 4% formaldehyde in PBSTx (1X PBS +  
585 0.1% Triton X-100) for 15/30 minutes; bleached in Bleaching Solution (1X SSC solution  
586 containing 5% deionized formamide and 1.2% hydrogen peroxide) for 2/4 hours; incubated in  
587 PBSTx containing 10 ug/ml Proteinase K and 0.1% SDS for 10/20 minutes; and re-fixed in 4%  
588 formaldehyde in PBSTx for 10/15 minutes. Planarians were blocked in Blocking Solution (5%  
589 heat inactivated horse serum, 5% Roche Western Blocking Buffer in TNTx [0.1 M Tris pH 7.5,  
590 0.15 M NaCl, 0.3% Triton X-100]) for 2 hours at room temperature, and incubated in Blocking

591 Solution containing anti-Digoxigenin-POD (1:2000; Roche #11207733910), anti-Fluorescein-  
592 POD (1:2000; Roche #11426346910), or anti- Dinitrophenyl-HRP (1:2000; Vector Laboratories  
593 #MB-0603) for 8 hours at 12°C. For fluorescent development of riboprobes, tyramide signal  
594 amplification (TSA) reactions were performed for 30 minutes.

595

### 596 **Phospho-Histone H3 immunofluorescence**

597 Immunostaining was performed after FISH development by re-blocking planarians in Blocking  
598 Solution (5% heat inactivated horse serum, 5% Roche Western Blocking Buffer in TNTx) for 2  
599 hours at room temperature, labeling mitotic cells with anti-phospho-Histone H3 (Ser10) (1:2000;  
600 Millipore Cat# 05-806) in Blocking Solution overnight at 12°C, washing 6X in PBSTx (30  
601 minutes each), re-blocking for 2 hours at room temperature, and incubating with peroxidase-  
602 conjugated goat anti-mouse (1:500; Jackson ImmunoResearch Labs #115-035-044) in blocking  
603 solution overnight at 12°C. Planarians were washed 6X in PBSTx (30 minutes each) and TSA  
604 was performed for 30 minutes.

605

### 606 **Imaging**

607 Confocal imaging was performed using a ZEISS LSM 880 with the following objectives: EC  
608 Plan-Neofluar 10x/0.3 M27, Plan-Apochromat 20x/0.8 M27, Plan-Apochromat 40x/1.3 Oil DIC  
609 M27. Image processing was performed using ZEISS ZEN 3.1 (blue edition) for linear  
610 adjustments and maximum intensity projections.

611

612 **RNA interference**

613 In vitro dsRNA synthesis was performed as previously described [79] by in vitro transcription  
614 from PCR amplicons flanked by T7 promoters. In vitro transcription reactions were carried out  
615 overnight at 31°C, DNase-treated, brought up to 80-100 µl final volume with water, and  
616 annealed. dsRNA was added to liver (1:2–1:5) and fed to animals. dsRNA generated from the  
617 *CamR* and *ccdB*-containing insert of the pJC53.2 vector was used for all control RNAi feedings  
618 [51].

619

620 **Quantification and statistical analysis**

621 Cell counting was performed manually. Counts for all experiments are detailed in S1 Data.  
622 Statistical analyses were performed using GraphPad Prism software. Statistical tests, significance  
623 levels, number of data points, planarian numbers (n), and experimental replicates (N) are  
624 provided in the text and/or figure legends.

625

626 **Acknowledgements**

627 We thank Newmark lab members, past and present, for discussion and feedback. We especially  
628 thank Katherine Browder for excellent technical support, John Brubacher for invaluable  
629 comments on the manuscript, Tracy Chong for assistance with early characterization of *klf4*, and  
630 Matthew Stefely for providing illustrations/graphics. This work was supported by NIH R01  
631 HD043403. M.I. was a Damon Runyon Fellow supported by the Damon Runyon Cancer  
632 Research Foundation (DRG-2135-12). P.A.N. and P.W.R. are Investigators of the Howard  
633 Hughes Medical Institute.

## 634 **References**

- 635 1. Extavour CGM. Evolution of the bilaterian germ line: lineage origin and modulation of  
636 specification mechanisms. *Integr Comp Biol.* 2007;47: 770–785. doi:10.1093/icb/icm027.
- 637 2. Extavour CG, Akam M. Mechanisms of germ cell specification across the metazoans:  
638 epigenesis and preformation. *Development.* 2003;130: 5869–5884. doi:10.1242/dev.00804.
- 639 3. Seydoux G, Braun RE. Pathway to totipotency: lessons from germ cells. *Cell.* 2006;127: 891–  
640 904. doi:10.1016/j.cell.2006.11.016.
- 641 4. Strome S, Updike D. Specifying and protecting germ cell fate. *Nat Rev Mol Cell Biol.*  
642 2015;16: 406–416. doi:10.4161/worm.28641.
- 643 5. Mochizuki K, Sano H, Kobayashi S, Nishimiya-Fujisawa C, Fujisawa T. Expression and  
644 evolutionary conservation of *nanos*-related genes in *Hydra*. *Dev Genes Evol.* 2000;210: 591–  
645 602. doi:10.1007/s004270000105.
- 646 6. Mochizuki K, Nishimiya-Fujisawa C, Fujisawa T. Universal occurrence of the *vasa*-related  
647 genes among metazoans and their germline expression in *Hydra*. *Dev Genes Evol.* 2001;211:  
648 299–308. doi:10.1007/s004270100156.
- 649 7. Funayama N. The stem cell system in demosponges: Insights into the origin of somatic stem  
650 cells. *Dev Growth Differ.* 2010;52: 1–14. doi:10.1111/j.1440-169x.2009.01162.x.
- 651 8. Bosch TCG, David CN. Stem cells of *Hydra magnipapillata* can differentiate into somatic  
652 cells and germ line cells. *Dev Biol.* 1987;121: 182–191. doi:10.1016/0012-1606(87)90151-5.
- 653 9. Fierro-Constaín L, Schenkelaars Q, Gazave E, Haguénauer A, Rocher C, Ereskovsky A, et al.  
654 The Conservation of the Germline Multipotency Program, from Sponges to Vertebrates: A  
655 Stepping Stone to Understanding the Somatic and Germline Origins. *Genome Biol Evol.* 2017;  
656 evw289. doi:10.1093/gbe/evw289.
- 657 10. Müller WA, Teo R, Frank U. Totipotent migratory stem cells in a hydroid. *Dev Biol.*  
658 2004;275: 215–224. doi:10.1016/j.ydbio.2004.08.006.
- 659 11. DuBuc TQ, Schnitzler CE, Chrysostomou E, McMahon ET, Febrimarsa, Gahan JM, et al.  
660 Transcription factor AP2 controls cnidarian germ cell induction. *Science.* 2020;367: 757–762.  
661 doi:10.1126/science.aay6782.
- 662 12. Bagaña J, Saló E, Auladell C. Regeneration and pattern formation in planarians. III.  
663 Evidence that neoblasts are totipotent stem cells and the source of blastema cells. *Development.*  
664 1989;107: 77–86.
- 665 13. Wagner DE, Wang IE, Reddien PW. Clonogenic neoblasts are pluripotent adult stem cells  
666 that underlie planarian regeneration. *Science.* 2011;332: 811–816. doi:10.1126/science.1203983.

- 667 14. Newmark PA, Sánchez Alvarado A. Bromodeoxyuridine specifically labels the regenerative  
668 stem cells of planarians. *Dev Biol.* 2000;220: 142–153. doi:10.1006/dbio.2000.9645.
- 669 15. Juliano CE, Swartz SZ, Wessel GM. A conserved germline multipotency program.  
670 *Development.* 2010;137: 4113–4126. doi:10.1242/dev.047969.
- 671 16. Ewen-Campen B, Schwager EE, Extavour CGM. The molecular machinery of germ line  
672 specification. *Mol Reprod Dev.* 2010;77: 3–18. doi:10.1002/mrd.21091.
- 673 17. Nakagawa H, Ishizu H, Hasegawa R, Kobayashi K, Matsumoto M. *Drpiwi-1* is essential for  
674 germline cell formation during sexualization of the planarian *Dugesia ryukyensis*. *Dev Biol.*  
675 2012;361: 167–176. doi:10.1016/j.ydbio.2011.10.014.
- 676 18. Palakodeti D, Smielewska M, Lu Y-C, Yeo GW, Graveley BR. The PIWI proteins  
677 SMEDWI-2 and SMEDWI-3 are required for stem cell function and piRNA expression in  
678 planarians. *RNA.* 2008;14: 1174–1186. doi:10.1261/rna.1085008.
- 679 19. Reddien PW, Oviedo NJ, Jennings JR, Jenkin JC, Sánchez Alvarado A. SMEDWI-2 is a  
680 PIWI-like protein that regulates planarian stem cells. *Science.* 2005;310: 1327–1330.  
681 doi:10.1126/science.1116110.
- 682 20. Iyer H, Issigonis M, Sharma PP, Extavour CG, Newmark PA. A premeiotic function for  
683 *boule* in the planarian *Schmidtea mediterranea*. *Proc Natl Acad Sci USA.* 2016;113: E3509-18.  
684 doi:10.1073/pnas.1521341113.
- 685 21. Salvetti A, Rossi L, Lena A, Batistoni R, Deri P, Rainaldi G, et al. *DjPum*, a homologue of  
686 *Drosophila Pumilio*, is essential to planarian stem cell maintenance. *Development.* 2005;132:  
687 1863–1874. doi:10.1242/dev.01785.
- 688 22. Solana J, Lasko P, Romero R. *Spoltud-1* is a chromatoid body component required for  
689 planarian long-term stem cell self-renewal. *Dev Biol.* 2009;328: 410–421.  
690 doi:10.1016/j.ydbio.2009.01.043.
- 691 23. Rouhana L, Shibata N, Nishimura O, Agata K. Different requirements for conserved post-  
692 transcriptional regulators in planarian regeneration and stem cell maintenance. *Dev Biol.*  
693 2010;341: 429–443. doi:10.1016/j.ydbio.2010.02.037.
- 694 24. Shibata N, Kashima M, Ishiko T, Nishimura O, Rouhana L, Misaki K, et al. Inheritance of a  
695 Nuclear PIWI from Pluripotent Stem Cells by Somatic Descendants Ensures Differentiation by  
696 Silencing Transposons in Planarian. *Dev Cell.* 2016;37: 226–237.  
697 doi:10.1016/j.devcel.2016.04.009.
- 698 25. Wagner DE, Ho JJ, Reddien PW. Genetic regulators of a pluripotent adult stem cell system in  
699 planarians identified by RNAi and clonal analysis. *Cell Stem Cell.* 2012;10: 299–311.  
700 doi:10.1016/j.stem.2012.01.016.



- 701 26. Guo T, Peters AHFM, Newmark PA. A *bruno*-like gene is required for stem cell  
702 maintenance in planarians. *Dev Cell*. 2006;11: 159–169. doi:10.1016/j.devcel.2006.06.004.
- 703 27. Kim IV, Duncan EM, Ross EJ, Gorbovytska V, Nowotarski SH, Elliott SA, et al. Planarians  
704 recruit piRNAs for mRNA turnover in adult stem cells. *Genes Dev*. 2019;33: 1575–1590.  
705 doi:10.1101/gad.322776.118.
- 706 28. Issigonis M, Newmark PA. From worm to germ: Germ cell development and regeneration in  
707 planarians. *Curr Top Dev Biol*. 2019;135: 127–153. doi:10.1016/bs.ctdb.2019.04.001.
- 708 29. Newmark PA, Wang Y, Chong T. Germ cell specification and regeneration in planarians.  
709 Cold Spring Harbor symposia on quantitative biology. 2008;73: 573–581.  
710 doi:10.1101/sqb.2008.73.022.
- 711 30. Wolff E. Recent researches on the regeneration of Planaria. In: Rudnick D, editor.  
712 Regeneration: 20th Growth Symposium, Vol. 20. New York: The Roland Press; 1962. pp. 53–  
713 84.
- 714 31. Wang J, Chen R, Collins JJ. Systematically improved in vitro culture conditions reveal new  
715 insights into the reproductive biology of the human parasite *Schistosoma mansoni*. *PLOS Biol*.  
716 2019;17: e3000254. doi:10.1371/journal.pbio.3000254.
- 717 32. Wang J, Collins JJ. Identification of new markers for the *Schistosoma mansoni* vitelline  
718 lineage. *Int J Parasitol*. 2016;46: 405–410. doi:10.1016/j.ijpara.2016.03.004.
- 719 33. Takahashi K, Yamanaka S. Induction of pluripotent stem cells from mouse embryonic and  
720 adult fibroblast cultures by defined factors. *Cell*. 2006;126: 663–676.  
721 doi:10.1016/j.cell.2006.07.024.
- 722 34. Wang Y, Zayas RM, Guo T, Newmark PA. *nanos* function is essential for development and  
723 regeneration of planarian germ cells. *Proc Natl Acad Sci USA*. 2007;104: 5901–5906.  
724 doi:10.1073/pnas.0609708104.
- 725 35. Chong T, Collins JJ, Brubacher JL, Zarkower D, Newmark PA. A sex-specific transcription  
726 factor controls male identity in a simultaneous hermaphrodite. *Nat Comm*. 2013;4: 1814.  
727 doi:10.1038/ncomms2811.
- 728 36. Handberg-Thorsager M, Saló E. The planarian *nanos*-like gene *Smednos* is expressed in  
729 germline and eye precursor cells during development and regeneration. *Dev Genes and Evol*.  
730 2007;217: 403–411. doi:10.1007/s00427-007-0146-3.
- 731 37. Sato K, Shibata N, Orii H, Amikura R, Sakurai T, Agata K, et al. Identification and origin of  
732 the germline stem cells as revealed by the expression of *nanos*-related gene in planarians.  
733 *Develop Growth Differ*. 2006;48: 615–628. doi:10.1111/j.1440-169x.2006.00897.x.

- 734 38. Farnesi RM, Marinelli M, Tei S, Vagnetti D. Ultrastructural research on the spermatogenesis  
735 in *Dugesia lugubris*. *SL Riv Di Biol.* 1977;70: 113–36.
- 736 39. Saberi A, Jamal A, Beets I, Schoofs L, Newmark PA. GPCRs direct germline development  
737 and somatic gonad function in planarians. *PLOS Biol.* 2016;14: e1002457.  
738 doi:10.1371/journal.pbio.1002457.
- 739 40. Rouhana L, Tasaki J, Saberi A, Newmark PA. Genetic dissection of the planarian  
740 reproductive system through characterization of *Schmidtea mediterranea* CPEB homologs. *Dev*  
741 *Biol.* 2017;426: 43–55. doi:10.1016/j.ydbio.2017.04.008.
- 742 41. Morgan TH. Growth and regeneration in *Planaria lugubris*. *Arch Entwickl Org.* 1902;13:  
743 179–212. doi:10.1007/bf02161982.
- 744 42. Chong T, Stary JM, Wang Y, Newmark PA. Molecular markers to characterize the  
745 hermaphroditic reproductive system of the planarian *Schmidtea mediterranea*. *BMC Dev Biol.*  
746 2011;11: 69. doi:10.1186/1471-213x-11-69.
- 747 43. Davies EL, Lei K, Seidel CW, Kroesen AE, McKinney SA, Guo L, et al. Embryonic origin  
748 of adult stem cells required for tissue homeostasis and regeneration. *eLife.* 2017;6.  
749 doi:10.7554/elife.21052.
- 750 44. Hyman LH. *The Invertebrates: Vol. 2, Platyhelminthes and Rhynchocoela, the Acoelomate*  
751 *Bilateria.* McGraw-Hill; 1951.
- 752 45. King RS, Newmark PA. In situ hybridization protocol for enhanced detection of gene  
753 expression in the planarian *Schmidtea mediterranea*. *BMC Dev Biol.* 2013;13: 8–16.  
754 doi:10.1186/1471-213x-13-8.
- 755 46. King RS, Newmark PA. Whole-mount in situ hybridization of planarians. *Methods Mol Biol.*  
756 (Clifton, NJ). 2018;1774: 379–392. doi:10.1007/978-1-4939-7802-1\_12.
- 757 47. Laumer CE, Giribet G. Inclusive taxon sampling suggests a single, stepwise origin of  
758 ectolecithality in Platyhelminthes. *Biol J Linn Soc.* 2014;111: 570–588. doi:10.1111/bij.12236.
- 759 48. Laumer CE, Hejnol A, Giribet G. Nuclear genomic signals of the ‘microturbellarian’ roots of  
760 platyhelminth evolutionary innovation. *eLife.* 2015;4: e05503. doi:10.7554/elife.05503.
- 761 49. Egger B, Lapraz F, Tomiczek B, Müller S, Dessimoz C, Girstmair J, et al. A transcriptomic-  
762 phylogenomic analysis of the evolutionary relationships of flatworms. *Curr Biol.* 2015;25: 1347–  
763 1353. doi:10.1016/j.cub.2015.03.034.
- 764 50. Wang Y, Stary JM, Wilhelm JE, Newmark PA. A functional genomic screen in planarians  
765 identifies novel regulators of germ cell development. *Genes Dev.* 2010;24: 2081–2092.  
766 doi:10.1101/gad.1951010.

- 767 51. Collins JJ, Hou X, Romanova EV, Lambrus BG, Miller CM, Saberi A, et al. Genome-wide  
768 analyses reveal a role for peptide hormones in planarian germline development. *PLOS Biol.*  
769 2010;8: e1000509. doi:10.1371/journal.pbio.1000509.
- 770 52. Zayas RM, Hernández A, Habermann B, Wang Y, Stary JM, Newmark PA. The planarian  
771 *Schmidtea mediterranea* as a model for epigenetic germ cell specification: analysis of ESTs from  
772 the hermaphroditic strain. *Proc Natl Acad Sci USA.* 2005;102: 18491–18496.  
773 doi:10.1073/pnas.0509507102.
- 774 53. Rouhana L, Vieira AP, Roberts-Galbraith RH, Newmark PA. PRMT5 and the role of  
775 symmetrical dimethylarginine in chromatoid bodies of planarian stem cells. *Development.*  
776 2012;139: 1083–1094. doi:10.1242/dev.076182.
- 777 54. Hayashi K, Kobayashi T, Umino T, Goitsuka R, Matsui Y, Kitamura D. SMAD1 signaling is  
778 critical for initial commitment of germ cell lineage from mouse epiblast. *Mech Dev.* 2002;118:  
779 99–109. doi: 10.1016/s0925-4773(02)00237-x.
- 780 55. Lawson KA, Dunn NR, Roelen BA, Zeinstra LM, Davis AM, Wright CV, et al. *Bmp4* is  
781 required for the generation of primordial germ cells in the mouse embryo. *Genes Dev.* 1999;13:  
782 424–436. doi: 10.1101/gad.13.4.424.
- 783 56. Ying Y, Liu XM, Marble A, Lawson KA, Zhao GQ. Requirement of *Bmp8b* for the  
784 generation of primordial germ cells in the mouse. *Mol. Endocrinol.* 2000;14: 1053–1063.  
785 doi:10.1210/mend.14.7.0479.
- 786 57. Ying Y, Zhao G-Q. Cooperation of endoderm-derived BMP2 and extraembryonic ectoderm-  
787 derived BMP4 in primordial germ cell generation in the mouse. *Dev Biol.* 2001;232: 484–492.  
788 doi:10.1006/dbio.2001.0173.
- 789 58. Chang DH, Cattoretti G, Calame KL. The dynamic expression pattern of B lymphocyte  
790 induced maturation protein-1 (Blimp-1) during mouse embryonic development. *Mech Dev.*  
791 2002;117: 305–309. doi:10.1016/s0925-4773(02)00189-2.
- 792 59. Hayashi K, Lopes SMC de S, Surani MA. Germ cell specification in mice. *Science.*  
793 2007;316: 394–396. doi:10.1126/science.1137545.
- 794 60. Ohinata Y, Payer B, O’Carroll D, Ancelin K, Ono Y, Sano M, et al. Blimp1 is a critical  
795 determinant of the germ cell lineage in mice. *Nature.* 2005;436: 207–213.  
796 doi:10.1038/nature03813.
- 797 61. Vincent SD, Dunn NR, Sciammas R, Shapiro-Shalef M, Davis MM, Calame K, et al. The  
798 zinc finger transcriptional repressor Blimp1/Prdm1 is dispensable for early axis formation but is  
799 required for specification of primordial germ cells in the mouse. *Development.* 2005;132: 1315–  
800 1325. doi:10.1242/dev.01711.

- 801 62. Magnúsdóttir E, Surani MA. How to make a primordial germ cell. *Development*. 2014;141:  
802 245–252. doi:10.1242/dev.098269.
- 803 63. Grabole N, Tischler J, Hackett JA, Kim S, Tang F, Leitch HG, et al. Prdm14 promotes  
804 germline fate and naive pluripotency by repressing FGF signalling and DNA methylation.  
805 *EMBO Rep*. 2013;14: 629–637. doi:10.1038/embor.2013.67.
- 806 64. Kurimoto K, Yabuta Y, Ohinata Y, Shigeta M, Yamanaka K, Saitou M. Complex genome-  
807 wide transcription dynamics orchestrated by Blimp1 for the specification of the germ cell lineage  
808 in mice. *Genes Dev*. 2008;22: 1617–1635. doi:10.1101/gad.1649908.
- 809 65. Yamaji M, Seki Y, Kurimoto K, Yabuta Y, Yuasa M, Shigeta M, et al. Critical function of  
810 *Prdm14* for the establishment of the germ cell lineage in mice. *Nat Genet*. 2008;40: 1016–1022.  
811 doi:10.1038/ng.186.
- 812 66. Magnúsdóttir E, Dietmann S, Murakami K, Günesdogan U, Tang F, Bao S, et al. A tripartite  
813 transcription factor network regulates primordial germ cell specification in mice. *Nat Cell Biol*.  
814 2013;15: 1–13. doi:10.1038/ncb2798.
- 815 67. Weber S, Eckert D, Nettersheim D, Gillis AJM, Schäfer S, Kuckenber P, et al. Critical  
816 Function of AP-2gamma/TCFAP2C in Mouse Embryonic Germ Cell Maintenance. *Biol Reprod*.  
817 2010;82: 214–223. doi:10.1095/biolreprod.109.078717.
- 818 68. Nakaki F, Hayashi K, Ohta H, Kurimoto K, Yabuta Y, Saitou M. Induction of mouse germ-  
819 cell fate by transcription factors in vitro. *Nature*. 2013;501: 222–226. doi:10.1038/nature12417.
- 820 69. Magnúsdóttir E, Gillich A, Grabole N, Surani MA. Combinatorial control of cell fate and  
821 reprogramming in the mammalian germline. *Curr Opin Genet Dev*. 2012;22: 466–474.  
822 doi:10.1016/j.gde.2012.06.002.
- 823 70. Nakamura T, Extavour CG. The transcriptional repressor Blimp-1 acts downstream of BMP  
824 signaling to generate primordial germ cells in the cricket *Gryllus bimaculatus*. *Development*.  
825 2016;143: 255–263. doi:10.1242/dev.127563.
- 826 71. Donoughe S, Nakamura T, Ewen-Campen B, Green DA, Henderson L, Extavour CG. BMP  
827 signaling is required for the generation of primordial germ cells in an insect. *Proc Natl Acad Sci*  
828 *USA*. 2014;111: 4133–4138. doi:10.1073/pnas.1400525111.
- 829 72. Yabuta Y, Kurimoto K, Ohinata Y, Seki Y, Saitou M. Gene expression dynamics during  
830 germline specification in mice identified by quantitative single-cell gene expression profiling.  
831 *Biol Reprod*. 2006;75: 705–716. doi:10.1095/biolreprod.106.053686.
- 832 73. Kitadate Y, Shigenobu S, Arita K, Kobayashi S. Boss/Sev signaling from germline to soma  
833 restricts germline-stem-cell-niche formation in the anterior region of *Drosophila* male gonads.  
834 *Dev Cell*. 2007;13: 151–159. doi:10.1016/j.devcel.2007.05.001.

- 835 74. Kitadate Y, Kobayashi S. Notch and Egfr signaling act antagonistically to regulate germ-line  
836 stem cell niche formation in *Drosophila* male embryonic gonads. Proc Natl Acad Sci USA.  
837 2010;107: 14241–14246. doi:10.1073/pnas.1003462107.
- 838 75. Gilboa L, Lehmann R. Soma–germline interactions coordinate homeostasis and growth in the  
839 *Drosophila* gonad. Nature. 2006;443: 97–100. doi:10.1038/nature05068.
- 840 76. Martín-Durán JM, Egger B. Developmental diversity in free-living flatworms. Evodevo.  
841 2012;3: 7. doi:10.1186/2041-9139-3-7.
- 842 77. Cebrià F, Newmark PA. Planarian homologs of netrin and netrin receptor are required for  
843 proper regeneration of the central nervous system and the maintenance of nervous system  
844 architecture. Development. 2005;132: 3691–3703. doi:10.1242/dev.01941.
- 845 78. Sánchez Alvarado A, Newmark PA, Robb SM, Juste R. The *Schmidtea mediterranea*  
846 database as a molecular resource for studying platyhelminthes, stem cells and regeneration.  
847 Development. 2002;129: 5659–5665. doi: 10.1242/dev.00167.
- 848 79. Rouhana L, Weiss JA, Forsthoefel DJ, Lee H, King RS, Inoue T, et al. RNA interference by  
849 feeding in vitro-synthesized double-stranded RNA to planarians: methodology and dynamics.  
850 Dev Dyn. 2013;242: 718–730. doi:10.1002/dvdy.23950.

851 **Figure Legends**

852

853 **Fig 1. *klf4* is expressed in gonads and vitellaria and is restricted to a subset on *nanos*<sup>+</sup> germ**  
854 **cells in planarian ovaries and testes.**

855 (A) Schematics depicting the dorsal (left) and ventral (right) views of landmark structures and  
856 various reproductive organs in adult sexual *S. mediterranea*. (B) Maximum-intensity projections  
857 of confocal sections showing fluorescence in situ hybridization (FISH) of *klf4* (green) in ventral  
858 head region (top), ventral tail region (middle), and dorsal tail region (bottom). (C) Maximum-  
859 intensity projection of confocal sections showing double FISH (dFISH) of *klf4* (green) and  
860 germline marker *nanos* (magenta) in ventral head region. *klf4*- and *nanos*-expressing cells are  
861 detected surrounding the tuba (tu) at the base of each ovary (ov), along the periphery of the  
862 ovaries, and in anterior ovarian fields (of) situated mediolaterally along the brain. (D) Single  
863 confocal section of a planarian ovary located posterior to the brain (br) showing *klf4* (green) and  
864 *nanos* (magenta) dFISH. *klf4*- and *nanos*-expressing cells are found at the ovary-tuba junction,  
865 along the periphery of the ovary, and in germ cells anterior to the ovary. Dashed line denotes  
866 ovary (white) and tuba (yellow) boundary. (E) Confocal section of *klf4* (green) and *nanos*  
867 (magenta) dFISH showing *klf4/nanos* double-positive and *nanos* single-positive cells along the  
868 periphery of the testis. Dashed line denotes testis boundary. (B-E) Nuclei are counterstained with  
869 DAPI (gray). Scale bars, 200  $\mu\text{m}$  (B), 100  $\mu\text{m}$  (C), and 50  $\mu\text{m}$  (D-E).

870

871 **Fig 2. *klf4* expression becomes restricted to a subset of *nanos*<sup>+</sup> male germ cells during**  
872 **sexual planarian maturation and asexual planarian growth.**

873 (A-C) Confocal sections showing dFISH of *klf4* (green) and *nanos* (magenta) in hatchling testis  
874 primordia (A), juvenile testes (B), and sexually mature adult testes (C). *klf4* is expressed in most  
875 *nanos*<sup>+</sup> male PGCs in hatchlings and becomes progressively restricted to a subpopulation of  
876 *nanos*<sup>+</sup> germ cells as planarians sexually mature. (D-E) Confocal sections showing dFISH of *klf4*  
877 (green) and *nanos* (magenta) in testis primordia in small (D) and large (E) asexual planarians.  
878 *klf4* is co-expressed in almost all *nanos*<sup>+</sup> male germ cells in small asexuals and is restricted to a  
879 subset of *nanos*<sup>+</sup> male germ cells in large asexuals. (A-E) Percentages reflect *nanos*<sup>+</sup> cells that  
880 are also *klf4*<sup>+</sup>. Nuclei are counterstained with DAPI (gray). Scale bars, 50  $\mu$ m.

881

882 **Fig 3. *klf4*<sup>+</sup> germ cells in planarian ovaries and testes are mitotically active.**

883 (A-C) Confocal sections showing dFISH of *klf4* (green) and *nanos* (magenta) and  
884 immunostaining of mitotic marker phospho-Histone H3 (pHH3; cyan) in the ovarian field (of  
885 located anterior to the ovary (ov) and proximal to the brain (br; boundary denoted by yellow  
886 dashed line) (A), the ovary, which is anterior to the tuba (tu) (B), and the testis (boundary  
887 denoted by gray dashed line) (C). Side panels are high magnification views of *klf4*/*nanos*/pHH3  
888 triple-positive cells (yellow arrowheads). (D) Confocal sections (top 4 panels) and maximum-  
889 intensity projections (bottom 2 panels) showing dFISH of *klf4* (green) and *nanos* (magenta) and  
890 immunostaining of pHH3 (cyan) in testes. Yellow numbers denote pHH3<sup>+</sup> germ cells dividing  
891 throughout spermatogenesis: single *nanos*<sup>+</sup> cell; single *nanos*<sup>-</sup> cell; 2-, 4-, 8-cell spermatogonial  
892 cysts; and 16- and 32-cell spermatocyte cysts. (A-D) Nuclei are counterstained with DAPI  
893 (gray). Scale bars, 50  $\mu$ m for whole-gonad images, 20  $\mu$ m for side panels.

894 **Fig 4. *klf4* is required for gametogenesis in adult ovaries and testes and is necessary for**  
895 **PGC specification.**

896 (A) RNAi scheme during development in sexual *S. mediterranea* from newborn hatchling to  
897 sexually mature adult. (B) Single confocal section of an ovary (ov) located at the posterior of the  
898 brain (br) showing dFISH of *nanos* (magenta) and *ophis* (green; somatic gonadal cells, tuba (tu),  
899 oviduct (od) in control and *klf4* RNAi planarians. (C) Quantification of *nanos*<sup>+</sup> germ cells,  
900 *CPEBI*<sup>+</sup> oocytes, *ophis*<sup>+</sup> somatic gonadal cells, and *LamaA*<sup>+</sup> somatic gonadal cells per ovary in  
901 control and *klf4* RNAi animals. Data are presented as mean ± SD. *klf4* RNAi results in  
902 significantly fewer germ cells and a corresponding increase in somatic support cells compared to  
903 control RNAi ovaries, p<0.0001, two-tailed Welch's t-test. (D) Maximum-intensity projections  
904 of confocal sections showing dFISH of *dmdl* (magenta; somatic gonadal cells) and *nanos*  
905 (green) in dorsal tail region. *dmdl*- and *nanos*-expressing cells are detected surrounding the  
906 DAPI-rich sperm located at the center of each testis (te) in control RNAi planarians. *dmdl*<sup>+</sup>  
907 somatic gonadal cells are present but display a “collapsed” appearance due to the loss of germ  
908 cells in *klf4* RNAi planarians. Dashed line denotes planarian boundary. (E) Confocal sections of  
909 control and *klf4* RNAi testes. Note loss of spermatogenesis and “collapsed” appearance of *dmdl*<sup>+</sup>  
910 somatic gonadal cells in *klf4* RNAi testes compared to controls. (F) Amputation scheme to assay  
911 de novo re-specification of germ cells. Amputation anterior to the ovaries results in a head  
912 fragment lacking any reproductive tissues (soma only). This head fragment will regenerate a new  
913 trunk and tail and will specify new germ cells. (G-J) Maximum-intensity projections of confocal  
914 sections showing dFISH of *klf4* (green) and *nanos* (magenta) in head regenerates 2 weeks post-  
915 amputation. N=3-5 experiments, n=10-35 planarians (G) Control RNAi head regenerates specify  
916 new *nanos*<sup>+</sup> PGCs that co-express *klf4*. (H-J) *klf4* and *nanos* RNAi head regenerates phenocopy



917 *dmdl* knockdowns and fail to specify *klf4*<sup>+</sup>/*nanos*<sup>+</sup> PGCs. (**B, D-E, G-J**) Nuclei are  
918 counterstained with DAPI (gray). Scale bars, 100 μm (**B**), 200 μm (**D**), 50 μm (**E**), 200 μm for  
919 whole-planarian images, 50 μm for side panels (**G-J**).

920

921 **Fig 5. *klf4*<sup>+</sup> cells are present in vitellaria and are the progenitors of yolk cells.**

922 (**A-D**) Maximum-intensity projections of confocal sections showing dFISH of *klf4* (green) with  
923 *nanos* (**A**), or vitellaria markers *CPEB1* (**B**), *surfactant b* (**C**), and *MXI* (**D**) (magenta) in the  
924 ventral posterior region of sexually mature planarians. Dashed line denotes planarian boundary.

925 (**A'-D'**) Single confocal sections of dFISH corresponding to **A-D**. (**A'**) dFISH of ventrally  
926 expressed *klf4* (green) and *nanos* (magenta). Almost all *klf4*<sup>+</sup> cells co-express *nanos* whereas *klf4*  
927 is expressed in a subset of *nanos*<sup>+</sup> cells. (**B'-D'**) *klf4* is expressed in a subset of *CPEB1*<sup>+</sup> (**B'**) and

928 *surfactant b*<sup>+</sup> (**C'**) yolk cells, but not in *MXI*<sup>+</sup> yolk cells (**D'**). (**A'-D'**) Side panels are high-  
929 magnification views of outlined areas showing *klf4* single- (white arrowheads) and double-

930 positive cells (yellow arrowheads). Note the increase in cell size as *klf4*<sup>+</sup> cells differentiate into

931 *CPEB1*<sup>+</sup>, *surfactant b*<sup>+</sup>, and ultimately *MXI*<sup>+</sup> yolk cells. (**E**) Schematic depicting genes

932 expressed during developmental progression of yolk cell lineage. (**F-G**) Maximum-intensity

933 projections of confocal sections showing FISH of *nanos* (**F**) and *MXI* (**G**) (green) in ventral tail

934 region of control and *klf4* RNAi animals. Dashed line denotes planarian boundary. N=3

935 experiments, n=8-15 planarians. *klf4* RNAi results in loss of *nanos*-expressing cells and a

936 reduction of *MXI*<sup>+</sup> yolk cells in the vitellaria. (**A'-D'**, **F-G**) Nuclei are counterstained with DAPI

937 (gray). Scale bars, 200 μm (**A-D, F-G**), 50 μm for overview images, 20 μm for side panels (**A'-**

938 **D'**).

939

940 **Fig 6. Yolk cells share features with neoblasts and germ cells.**

941 (A-D) Single confocal sections showing dFISH of neoblast and germ cell marker *piwi-1* (green)  
942 and *klf4* (A), *CPEB1* (B), *surfactant b* (C), and *MX1* (D) (magenta). Side panels are high-  
943 magnification views of outlined areas showing *piwi-1* double-positive cells (yellow arrowheads).  
944 (E-F) Single confocal sections showing dFISH of neoblast and germ cell marker *gH4* (green)  
945 and *klf4* (E) and *surfactant b* (F) (magenta). Side panels are high-magnification views of  
946 outlined areas showing *gH4* double-positive cells (yellow arrowheads). (G) Maximum-intensity  
947 projections of confocal sections (5  $\mu\text{m}$  thick) imaged from the ventral posterior region of  
948 sexually mature planarians showing *klf4* (green) and *nanos* (magenta) dFISH with pHH3 (cyan)  
949 immunostaining in vitellaria. *klf4*<sup>+</sup>/*nanos*<sup>+</sup> vitellocytes with high (top panels) and low levels  
950 (middle panels) of *klf4* expression are mitotically active. *klf4*<sup>-</sup>/*nanos*<sup>+</sup> yolk cell progenitors are  
951 able to divide (bottom panels). (A-G) Nuclei are counterstained with DAPI (gray). Scale bars, 50  
952  $\mu\text{m}$  for overview images, 20  $\mu\text{m}$  for side panels (A-F), 20  $\mu\text{m}$  (G).

953

954 **Fig 7. Vitellaria contain distinct cell types: yolk cells and non-yolk support cells.**

955 (A-D, F-G) Single confocal sections showing dFISH. Side panels are high-magnification views  
956 of outlined areas. (A) dFISH of *klf4* (magenta) and vitellaria marker *ophis* (green). *ophis*<sup>high</sup> cells  
957 do not co-express *klf4* (filled white arrowhead) but *ophis*<sup>low</sup> cells do (unfilled white arrowhead).  
958 (B-D) dFISH of *ophis* (green) and *CPEB1* (B), *surfactant b* (C), and *MX1* (D) (magenta).  
959 *ophis*<sup>low</sup> cells express yolk cell lineage differentiation markers. (E) proportion of cells in the  
960 vitellaria that co-express low levels (left) vs high levels (right) of *ophis*. *ophis*<sup>low</sup> cells  
961 predominantly co-express markers of the yolk cell lineage. Conversely, most *ophis*<sup>high</sup> cells co-  
962 express *LamA* but do not express yolk cell markers. (F) dFISH of *LamA* (magenta) and *ophis*

963 (green). *ophis*<sup>high</sup> cells co-express *LamA* (filled white arrowhead) whereas *ophis*<sup>low</sup> cells do not  
964 (unfilled white arrowhead). (G) dFISH of *LamA* (magenta) and *klf4* (green). *LamA* and *klf4* are  
965 never co-expressed in the same cells. (A-D, F-G) Nuclei are counterstained with DAPI (gray).  
966 Scale bars, 50 μm for overview images, 20 μm for side panels. (H) Schematic depicting genes  
967 expressed during developmental progression of *ophis*<sup>low</sup> yolk cells and associated *ophis*<sup>high</sup>  
968 support cells.

969

970 **Fig 8. Germ cell niche factor *ophis* is required to sustain yolk cell production/**

971 **vitellogenesis.**

972 (A-C) Maximum-intensity projections of confocal sections showing FISH of *LamA* (A), *klf4* (B),  
973 and *MXI* (C) (green) in the ventral posterior region of sexually mature control vs *ophis* RNAi  
974 animals. Dashed line denotes planarian boundary. N=3-5 experiments, n=7-26 planarians. (A)  
975 *ophis* RNAi results in a dramatic loss of the *LamA*<sup>+</sup> cells throughout the vitellaria. Note that  
976 *LamA* expression is only visible in the branched gut in *ophis* RNAi planarians. (B-C) *ophis*  
977 RNAi results in a reduction of *klf4*<sup>+</sup> yolk cell progenitors and *MXI*<sup>+</sup> differentiated yolk cells. (A-  
978 C) Nuclei are counterstained with DAPI (gray). Scale bars, 200 μm. (D) Model depicting  
979 similarities shared between gonads (where gametogenesis occurs) and vitellaria (where yolk cell  
980 production occurs). *klf4*<sup>+</sup>/*nanos*<sup>+</sup>/*piwi-1*<sup>+</sup> GSCs in testes and ovaries divide and give rise to *klf4*<sup>-</sup>  
981 /*nanos*<sup>+</sup>/*piwi-1*<sup>+</sup> progeny. These germ cells are supported by *ophis*<sup>+</sup> somatic gonadal niche cells.  
982 Vitellaria are comprised of *klf4*<sup>+</sup>/*nanos*<sup>+</sup>/*piwi-1*<sup>+</sup> “germ-cell-like” yolk progenitors that are  
983 mitotically competent, sustain yolk cell production, and are supported by *ophis*<sup>high</sup> support cells.

984 **Supplemental Figure Legends**

985

986 **S1 Fig. *klf4* is expressed in a subset of *nanos*<sup>+</sup> female germ cells in sexual and asexual**  
987 **planarians.**

988 (A-B) Confocal section showing triple FISH of *piwi-1* (cyan), *klf4* (green), and *nanos* (magenta)  
989 in female germ cells in hatchlings and sexually mature ovary. *klf4* is expressed in a subset of  
990 *nanos*<sup>+</sup>/*piwi-1*<sup>+</sup> female germ cells (compare filled (*klf4*<sup>+</sup>) to unfilled (*klf4*<sup>-</sup>) yellow arrowhead).  
991 All *klf4*<sup>+</sup>/*nanos*<sup>+</sup> germ cells are *piwi-1*<sup>+</sup>. A small fraction of *klf4*<sup>-</sup>/*nanos*<sup>+</sup> cells do not express  
992 *piwi-1* and are not germ cells (white arrowhead). (C-D) Confocal sections showing dFISH of *klf4*  
993 (green) and *nanos* (magenta) in female germ cells (located mediolaterally along the planarian  
994 brain) in small (C) and large (D) asexual planarians. *klf4* is expressed in a subset of *nanos*<sup>+</sup>  
995 female germ cells. Insets show high-magnification views of heterogeneity of *klf4* expression in  
996 *nanos*<sup>+</sup> cells. (A-D) Percentages reflect *nanos*<sup>+</sup> germ cells that are also *klf4*<sup>+</sup>. Nuclei are  
997 counterstained with DAPI (gray). Scale bars, 100 μm (A-B), 50 μm for whole-brain images, 10  
998 μm for insets (C-D).

999

1000 **S2 Fig. *klf4* is required for oogenesis and restricts expansion of somatic gonadal cells in**  
1001 **adult ovaries.**

1002 Single confocal section of an ovary located at the posterior of the brain (br) and anterior to the  
1003 tuba/oviduct (tu/od) showing dFISH of *CPEB1* (magenta; oocytes) and *LamA* (green; somatic  
1004 gonadal cells) in control and *klf4* RNAi planarians. *klf4* RNAi leads to oocyte loss and a non-  
1005 autonomous increase in somatic support cells. Nuclei are counterstained with DAPI (gray). Scale  
1006 bars, 100 μm.

1007 **S3 Fig. Defining the stages of yolk cell development.**

1008 (A-C) Maximum-intensity projections of confocal sections showing dFISH of vitellaria markers  
1009 *CPEBI* (A-B), *surfactant b* (A, C), and *MXI* (B-C) in the ventral posterior region of sexually  
1010 mature planarians. Dashed line denotes planarian boundary. (A'-C') Single confocal sections of  
1011 dFISH corresponding to A-C. (A') dFISH of ventrally expressed *CPEBI* (magenta) and  
1012 *surfactant b* (green). Almost all *CPEBI*<sup>+</sup> cells co-express *surfactant b* and all *surfactant b*<sup>+</sup> cells  
1013 are *CPEBI*<sup>+</sup>. (B') dFISH of *CPEBI* (magenta) and *MXI* (green). A subset of *CPEBI*<sup>+</sup> cells co-  
1014 express *MXI* whereas all *MXI*<sup>+</sup> cells are *CPEBI*<sup>+</sup>. (C') dFISH of *MXI* (magenta) and *surfactant*  
1015 *b* (green). A subset of *surfactant b*<sup>+</sup> cells co-expresses *MXI* whereas virtually all *MXI*<sup>+</sup> cells are  
1016 *surfactant b*<sup>+</sup>. (A'-C') Side panels are high-magnification views of outlined areas. (A'-C')  
1017 Nuclei are counterstained with DAPI (gray). Scale bars, 200 μm (A-C), 50 μm for overview  
1018 images, 20 μm for side panels (A'-C').

1019

1020 **S4 Fig. Vitellaria develop post-embryonically and produce differentiating yolk cells during**  
1021 **sexual maturation.**

1022 (A-B) Maximum-intensity projections of confocal sections showing dFISH of *klf4* (green) with  
1023 *nanos*, or vitellaria markers *CPEBI*, *surfactant b*, or *MXI* (magenta) in the ventral posterior  
1024 region of hatchlings (A) or juveniles (B). Dashed line denotes planarian boundary. (A)  
1025 Hatchlings do not express any of the vitellaria markers tested and are devoid of vitellaria. (B)  
1026 *klf4*<sup>+</sup>/*nanos*<sup>+</sup> yolk-cell progenitors, as well as *klf4*<sup>-</sup>/*nanos*<sup>+</sup>, *CPEBI*<sup>+</sup>, and *surfactant b*<sup>+</sup>  
1027 differentiating yolk cells are detected in all juveniles. Only a fraction of juveniles express *MXI*<sup>+</sup>  
1028 yolk cells (B). (A-B) Nuclei are counterstained with DAPI (gray). Scale bars, 100 μm.

1029

1030 **S5 Fig. Yolk cells express neoblast/germ cell markers.**

1031 (A) Single confocal sections showing dFISH of neoblast and germ cell marker *gH4* (magenta)  
1032 and *klf4* (green). *gH4* is expressed at high levels in neoblasts as well as in spermatogonia and  
1033 oogonia. *klf4*<sup>+</sup> cells in the testes (top panels), ovarian field, and ovary (ov) (bottom panel) co-  
1034 express *gH4* (yellow arrowheads). Note the absence of *gH4* in differentiated somatic cells found  
1035 in the brain (br) and tuba (tu). Nuclei are counterstained with DAPI (gray). (B-C) Maximum-  
1036 intensity projections of confocal sections showing dFISH of *klf4* and neoblast/germline markers  
1037 *piwi-1* or *gH4* in the vitellaria. (D) Maximum-intensity projection of confocal sections showing  
1038 dFISH of *gH4* (magenta) and *surfactant b* (green). Dashed line denotes planarian boundary.  
1039 Scale bars, 50 μm (A), 200 μm (B-D).

1040

1041 **S6 Fig. The vitellaria and ovary are comprised of two populations of *ophis*-expressing cells:**  
1042 ***ophis*<sup>high</sup> versus *ophis*<sup>low</sup> cells.**

1043 (A-F) Maximum-intensity projections of confocal sections showing dFISH of vitellaria markers  
1044 in the ventral posterior region of sexually mature planarians. Dashed line denotes planarian  
1045 boundary. (G) Confocal section of an ovary depicting *LamA* expression (magenta) in somatic  
1046 gonadal cells and *klf4* expression (green) in early germ cells. (H) Confocal section of an ovary  
1047 depicting *ophis*<sup>high</sup> expression (magenta/gray) in somatic gonadal cell nuclei (filled arrowhead)  
1048 and *ophis*<sup>low</sup> expression in oogonia and oocytes (unfilled arrowhead). (G-H) Dashed line denotes  
1049 ovary (white) and tuba (yellow) boundary. Nuclei are counterstained with DAPI (gray). Scale  
1050 bars, 200 μm (A-F), 50 μm (G-H).

**Fig 1.**

**A**

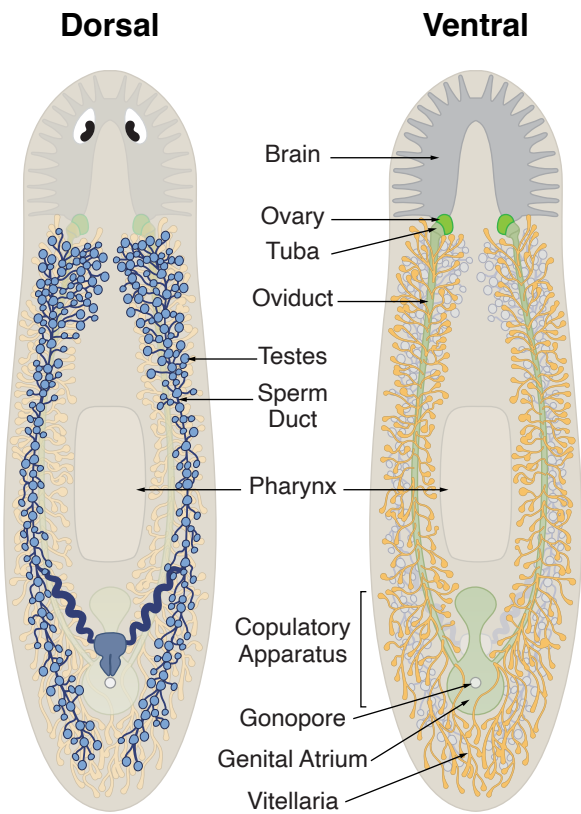

**B**

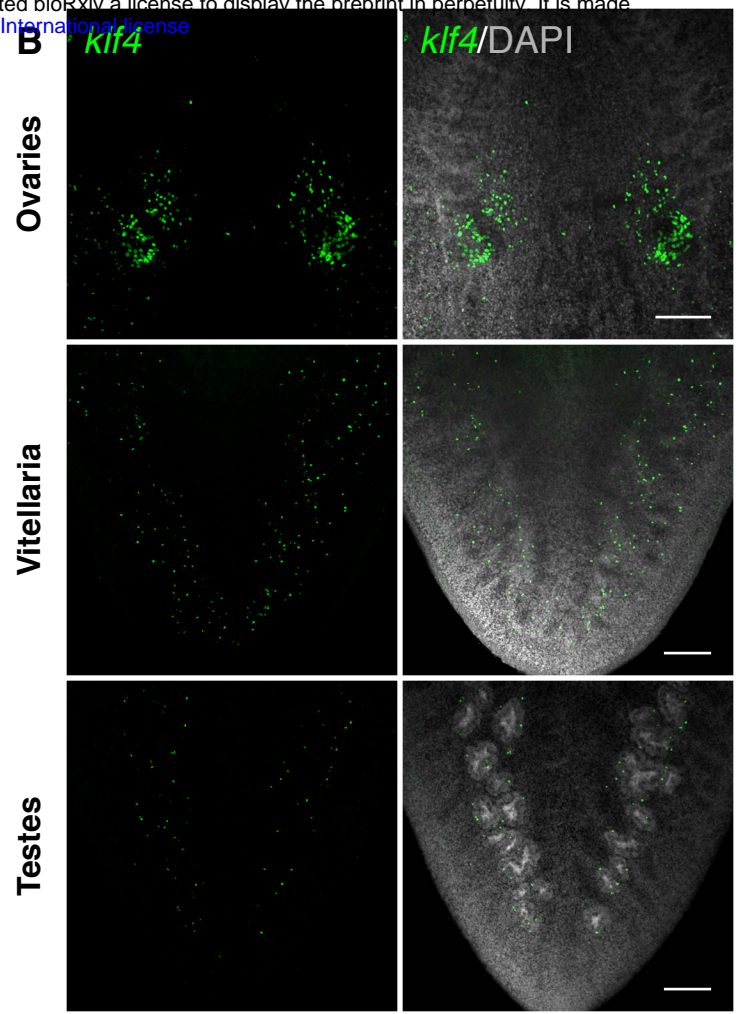

**C**

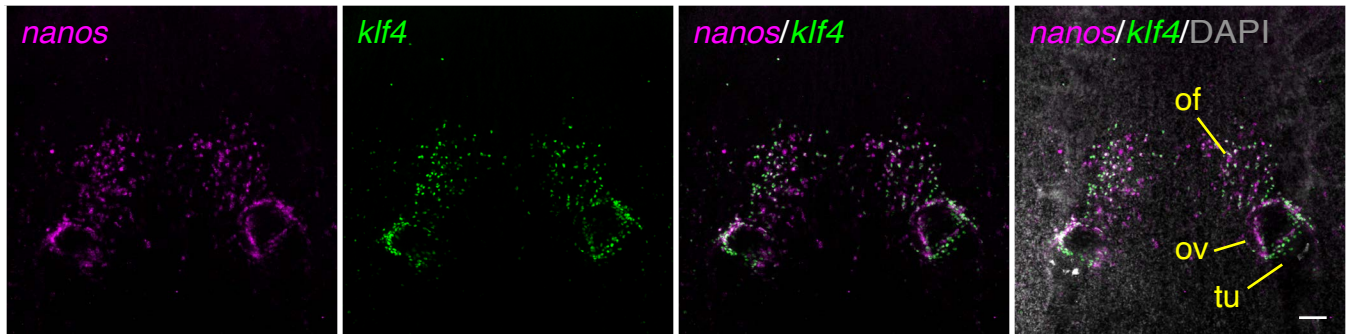

**D**

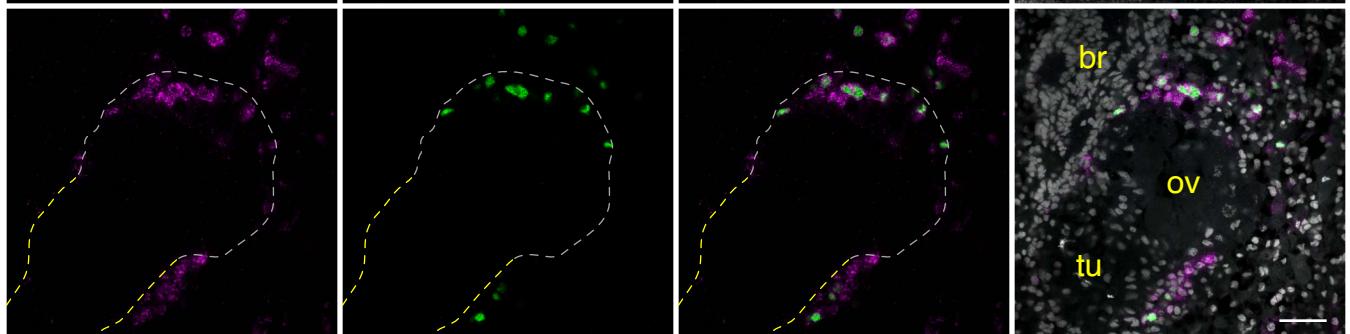

**E**

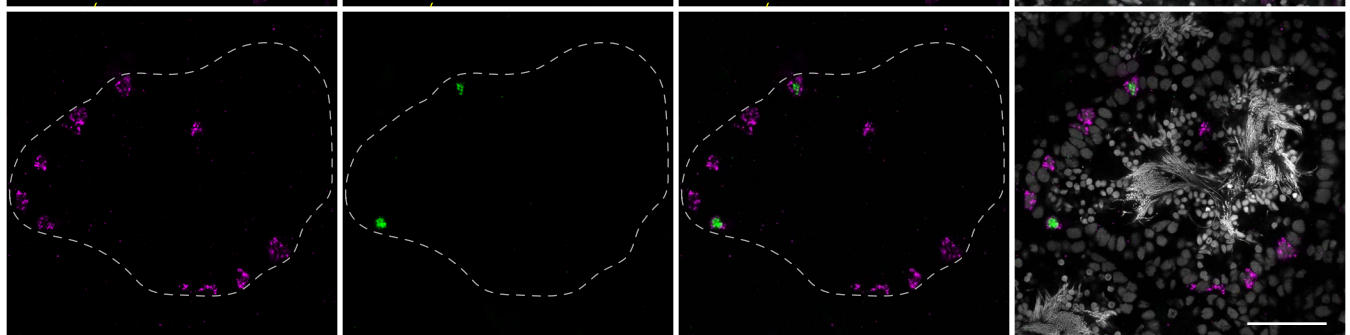

Fig 2.

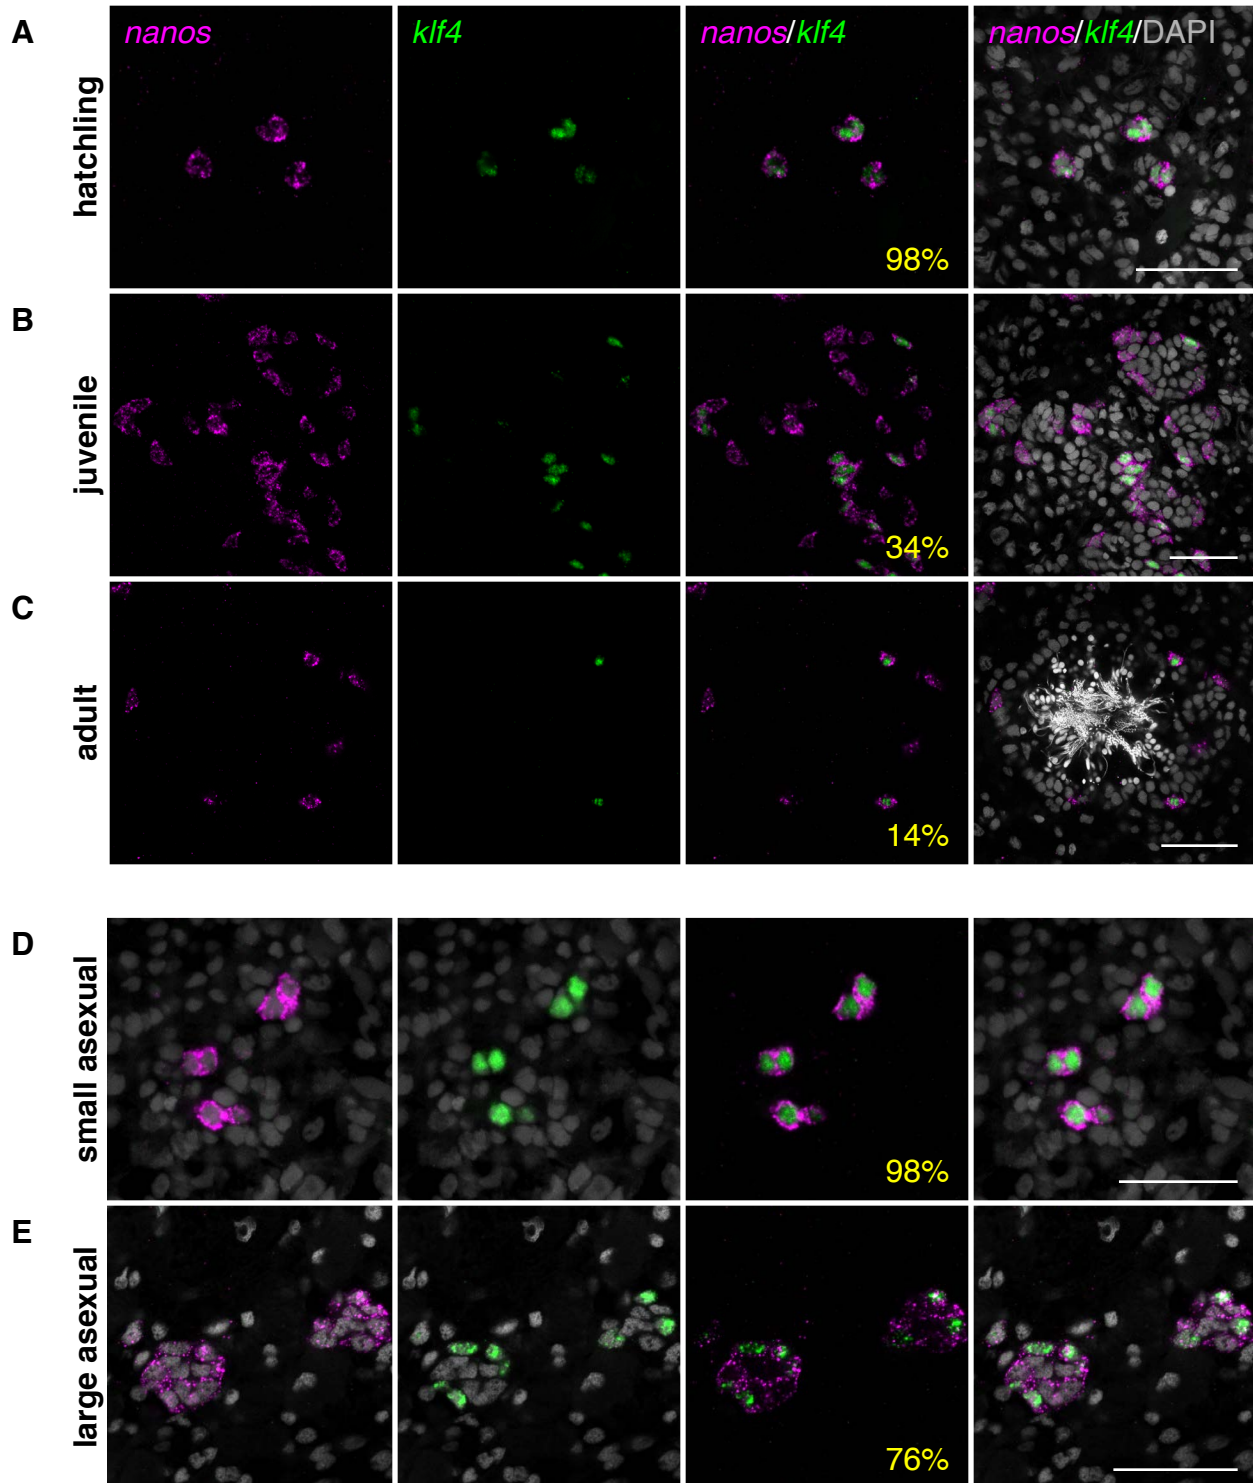



Fig 3.

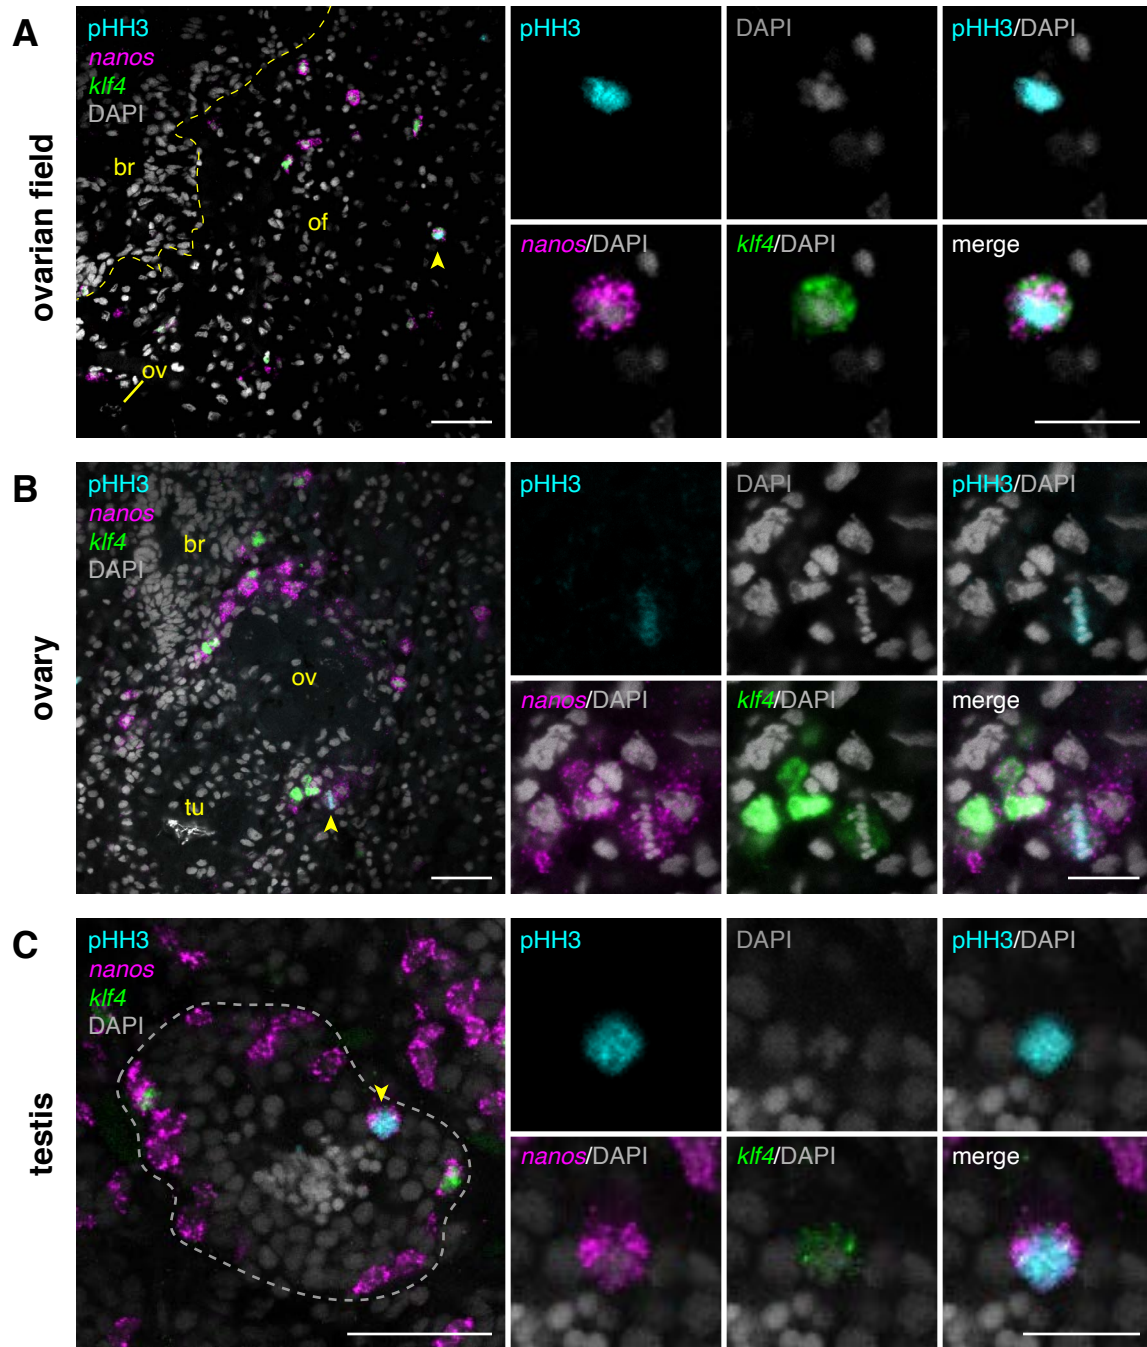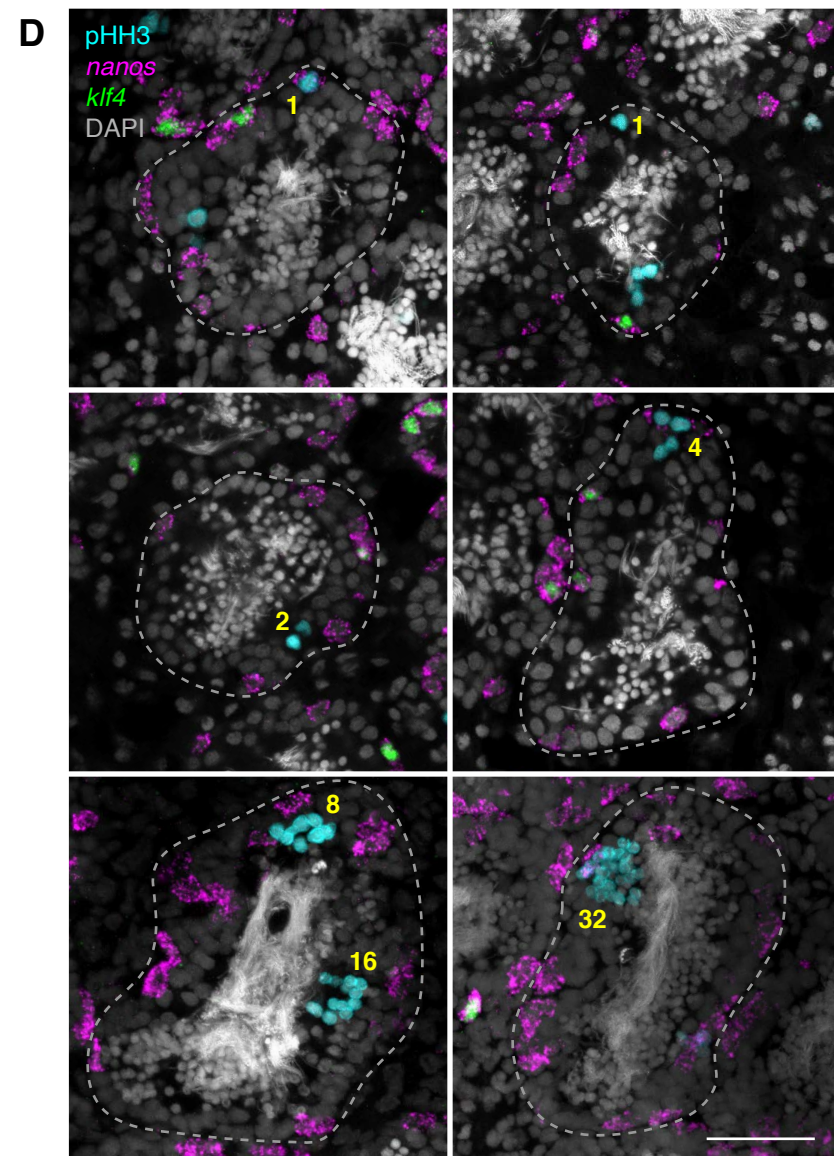

**Fig 4.**

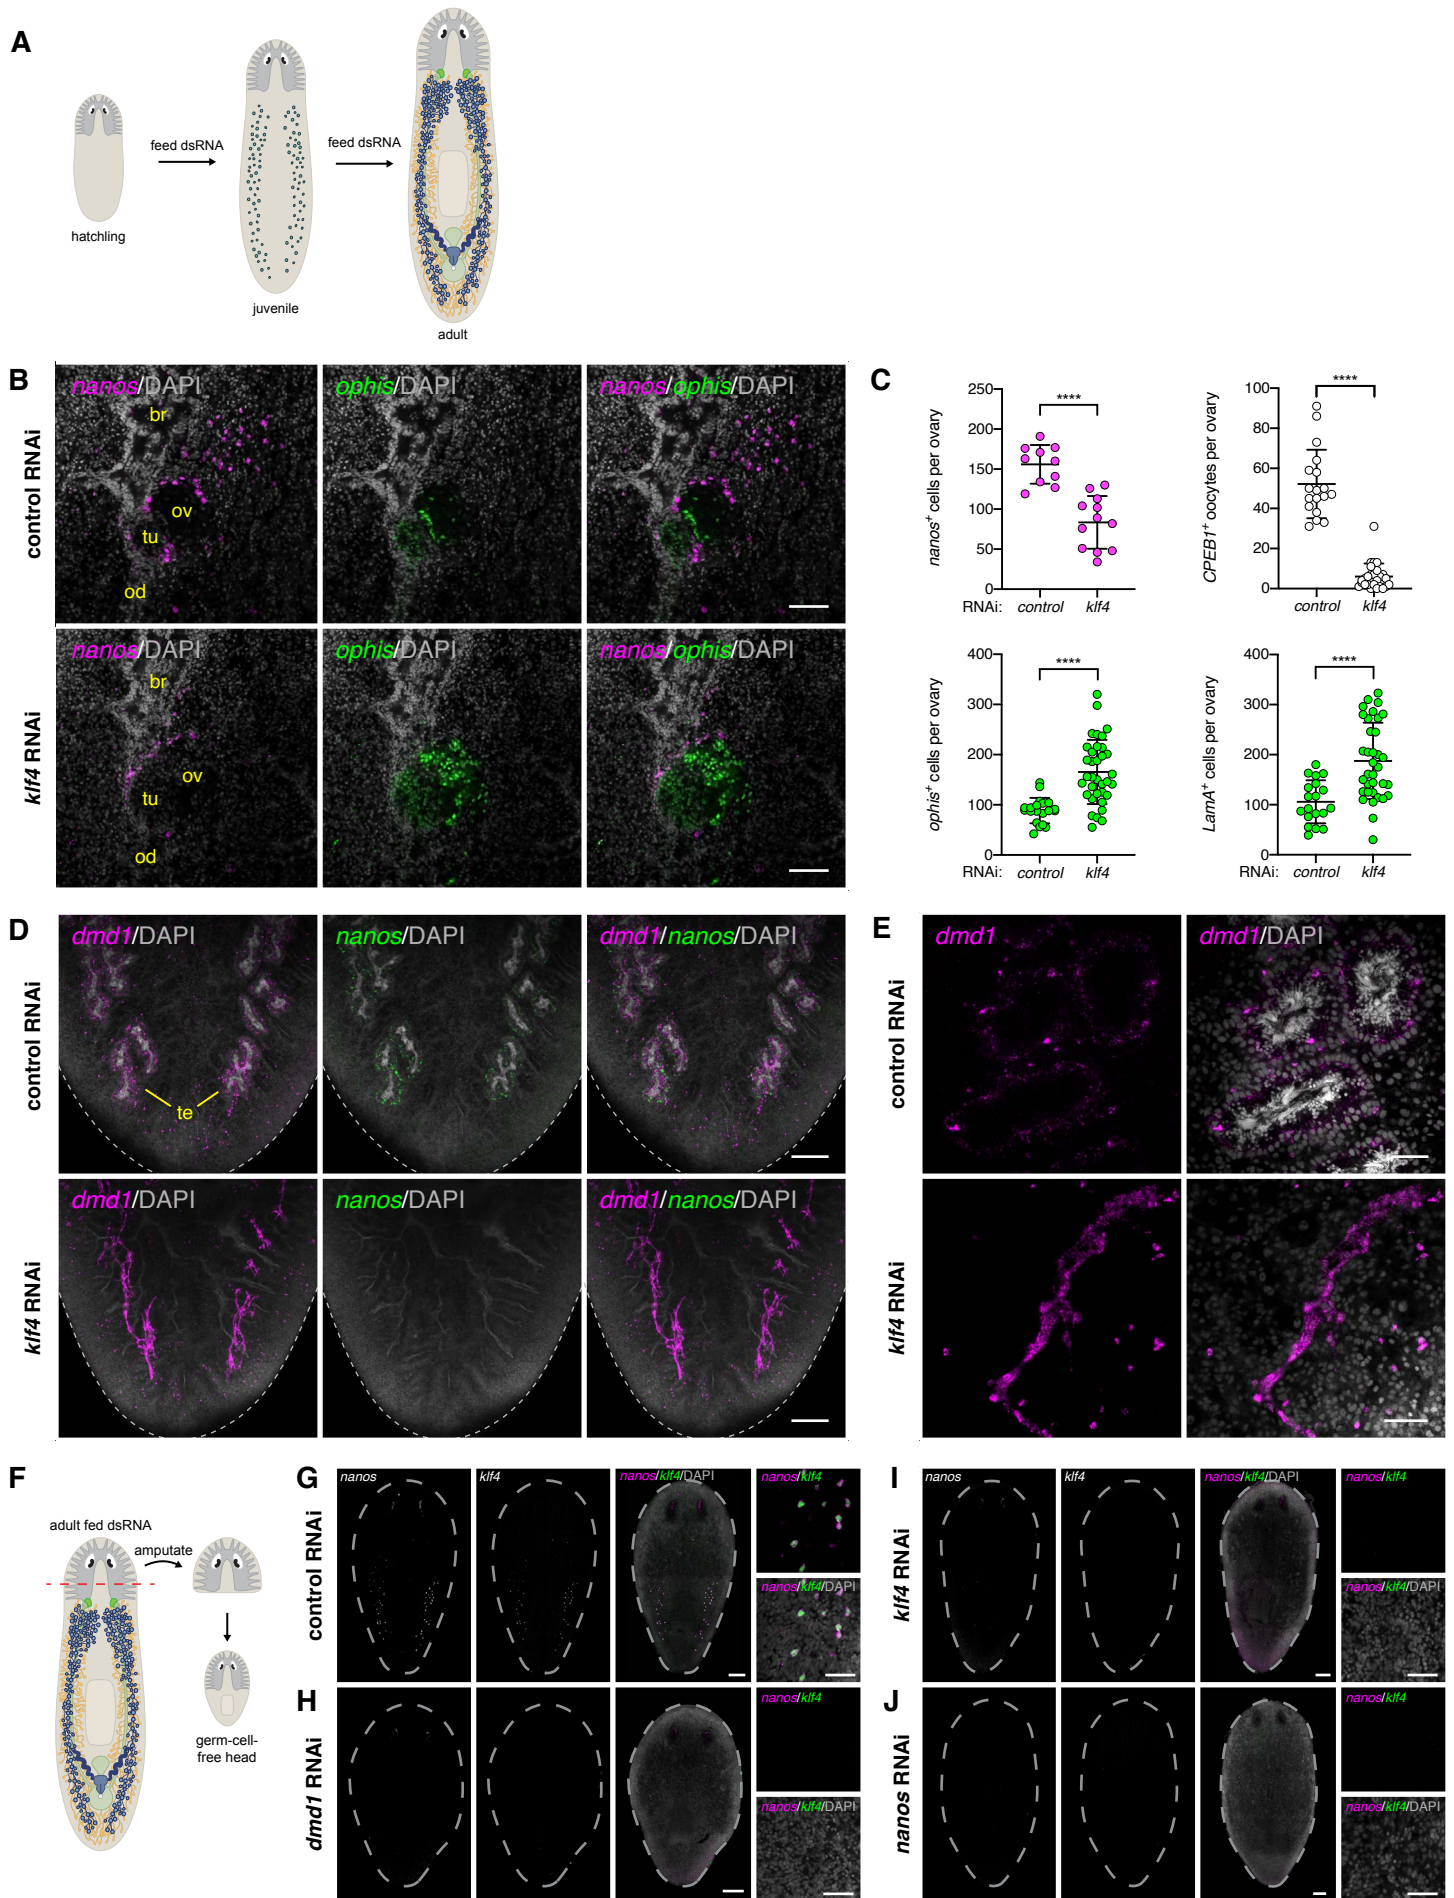

**Fig 5.**

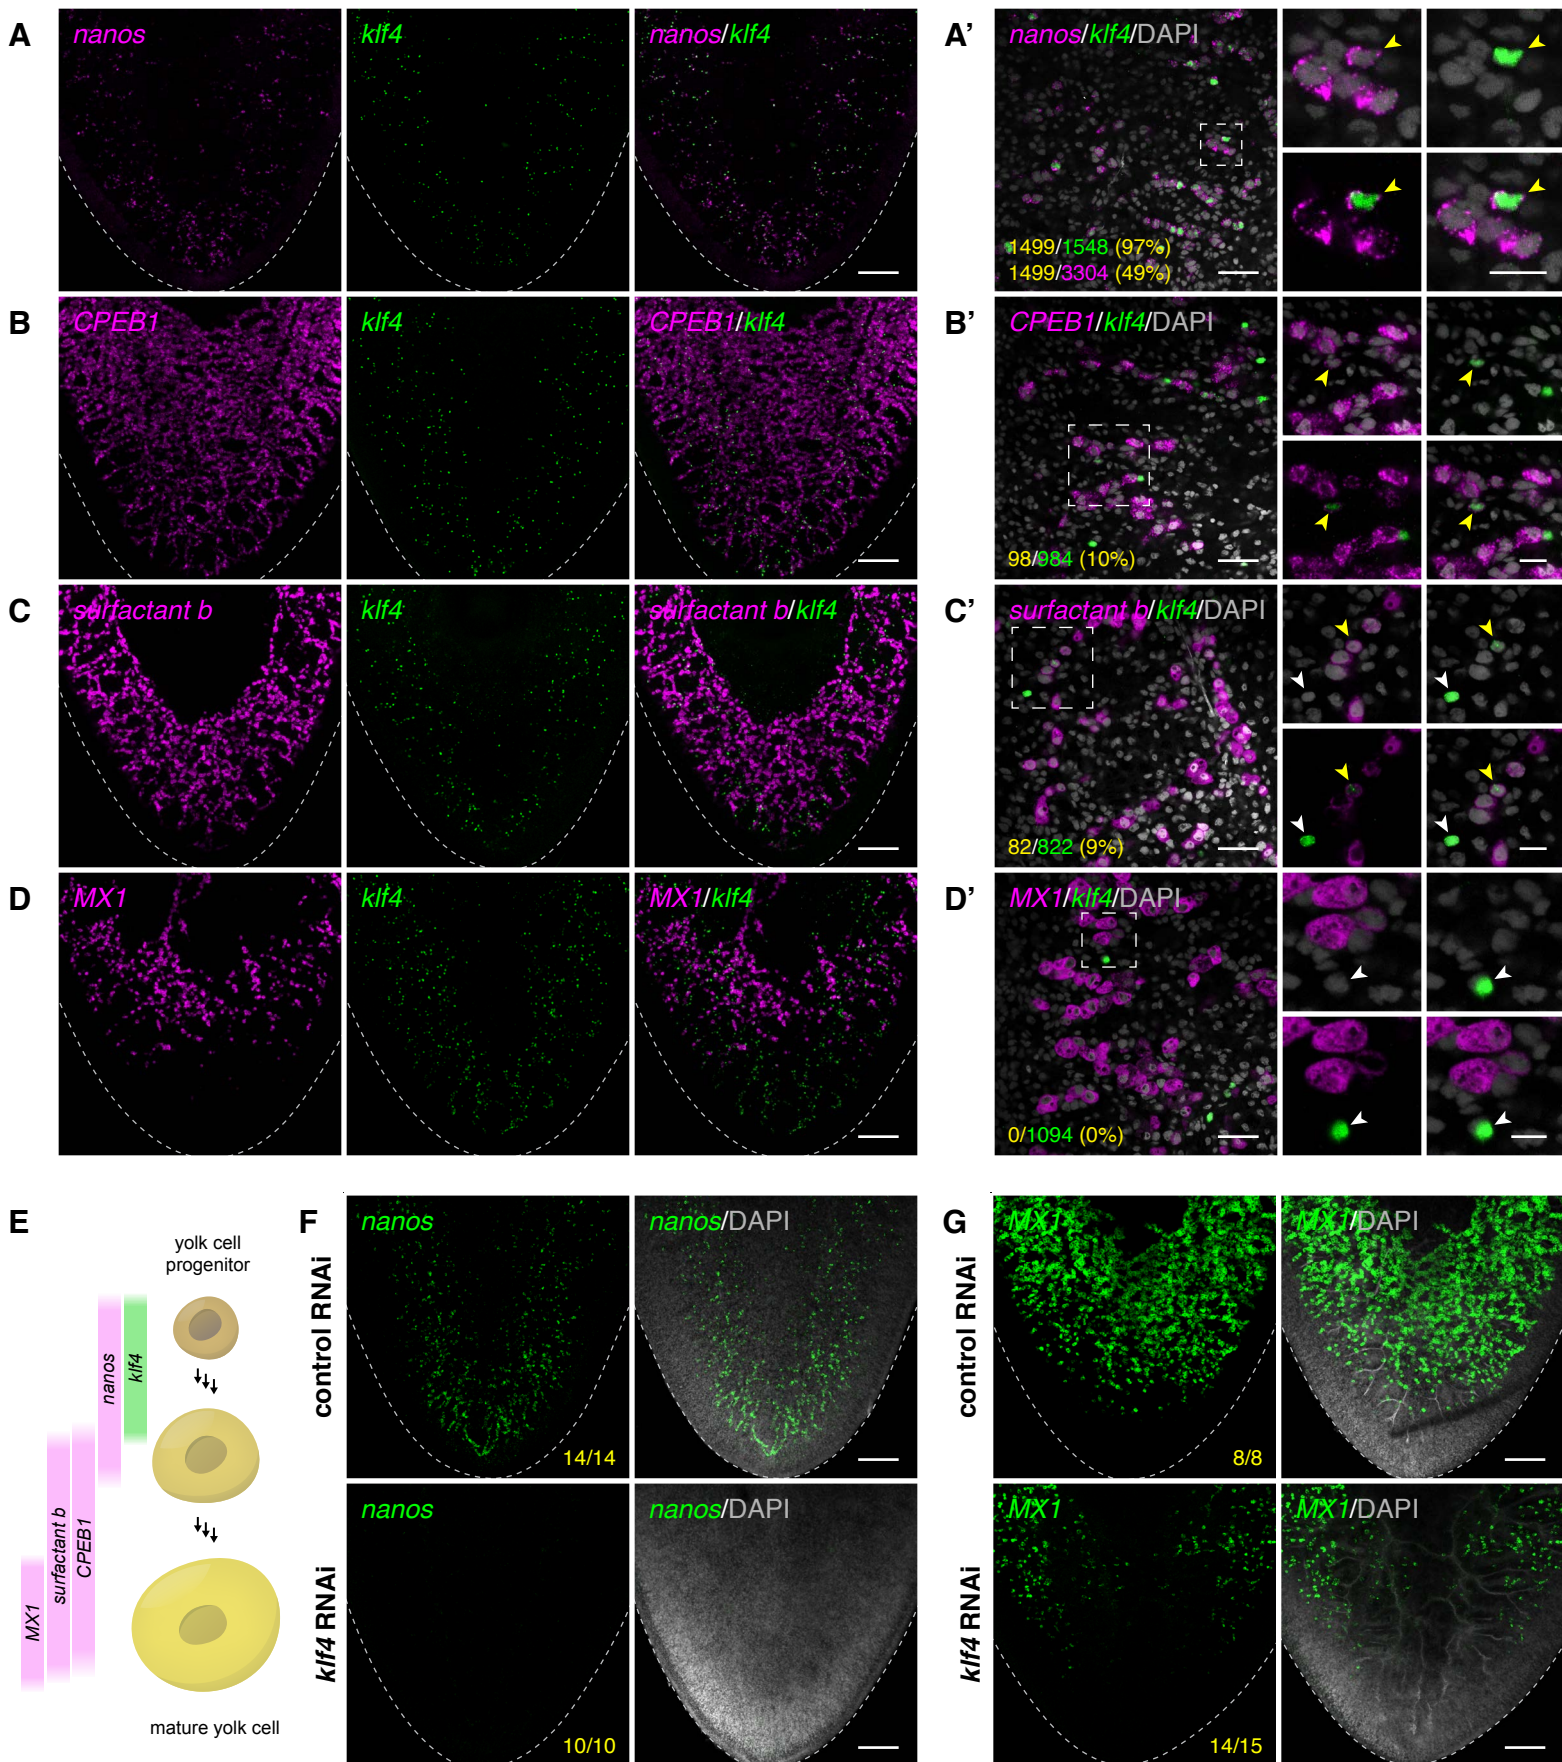

Fig 6.

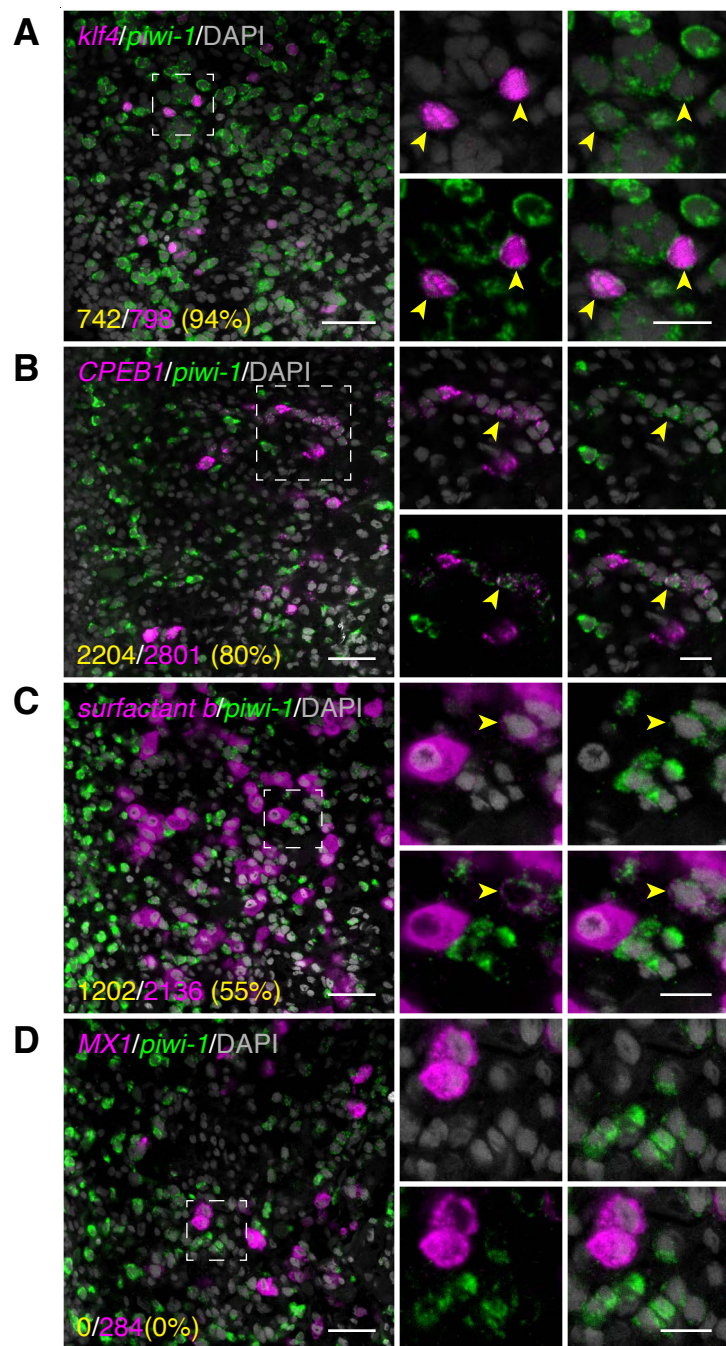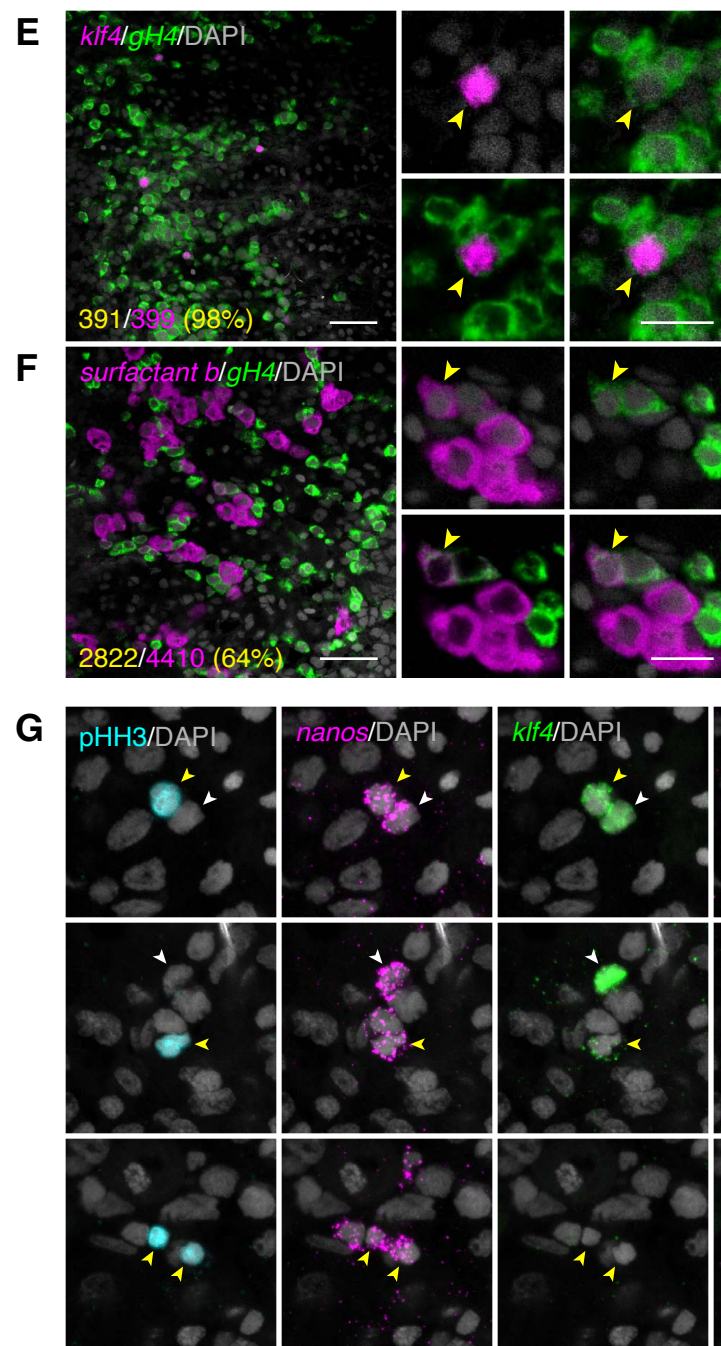

Fig 7.

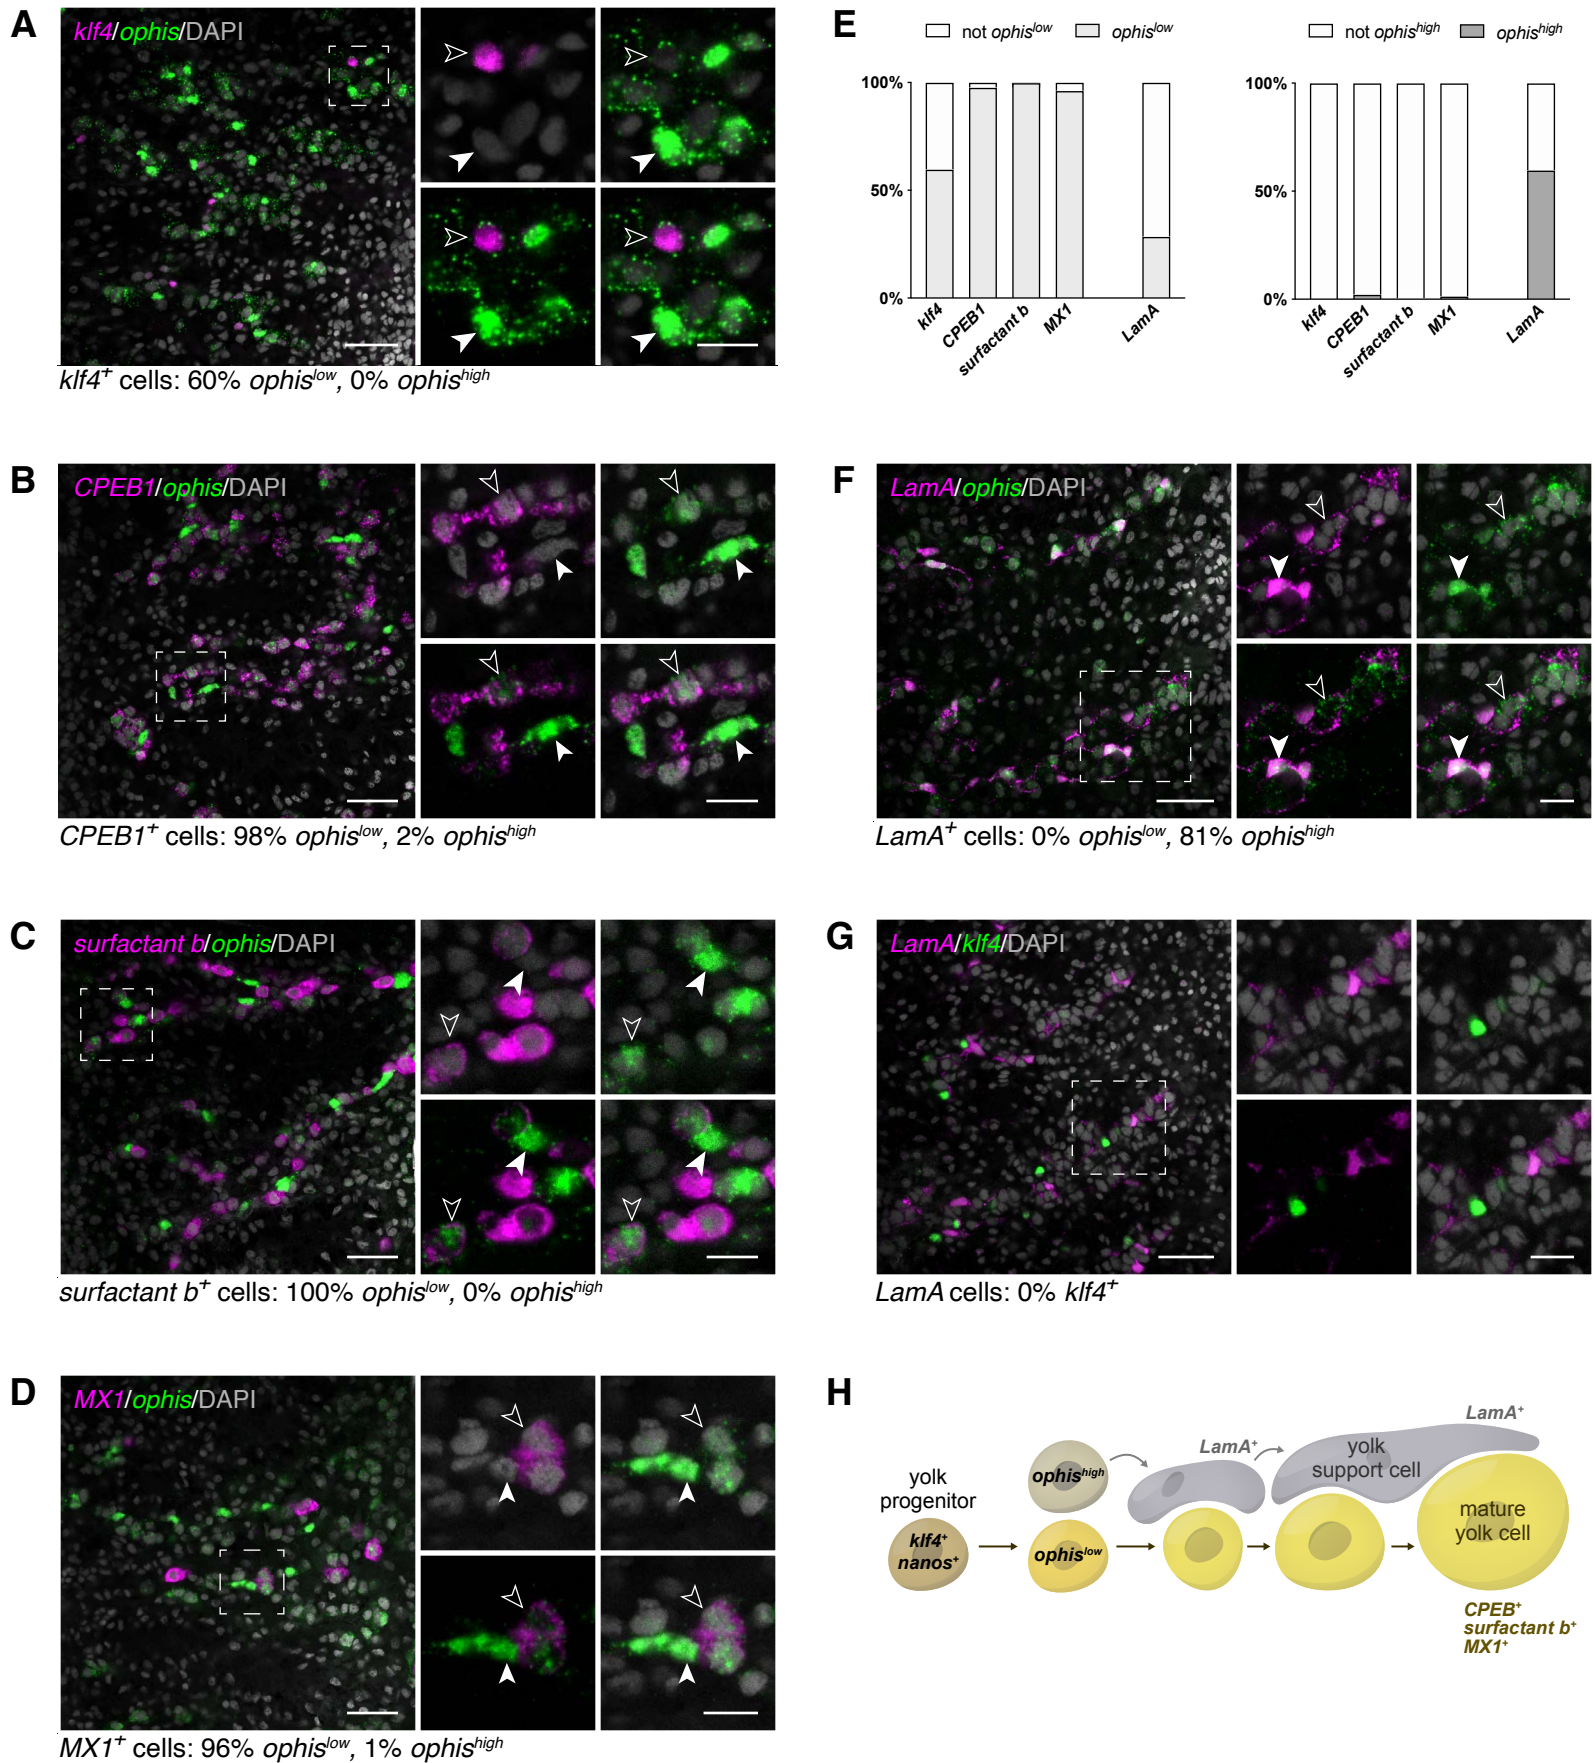

Fig 8.

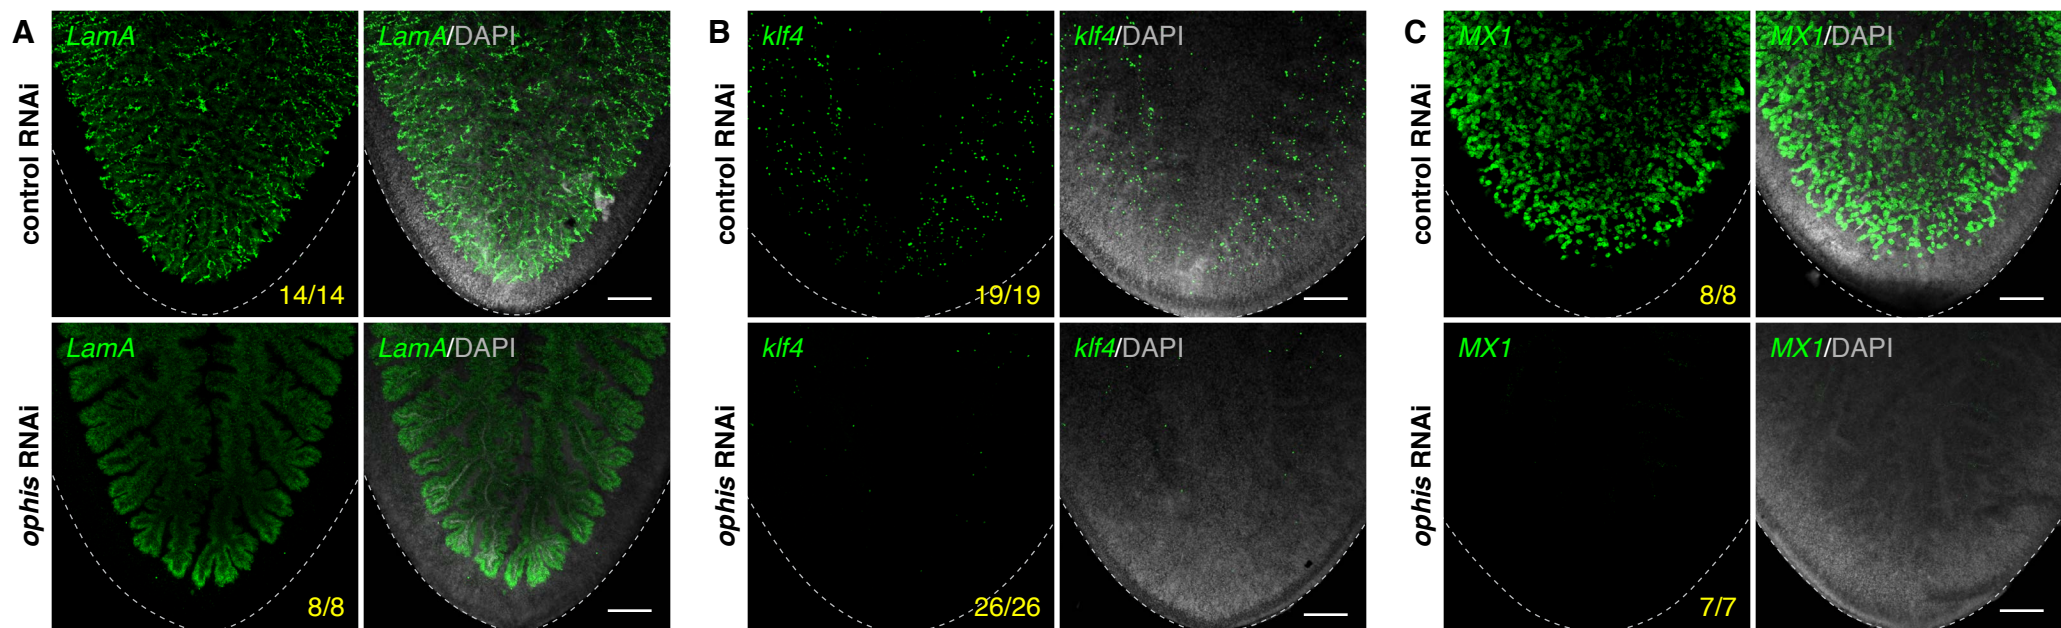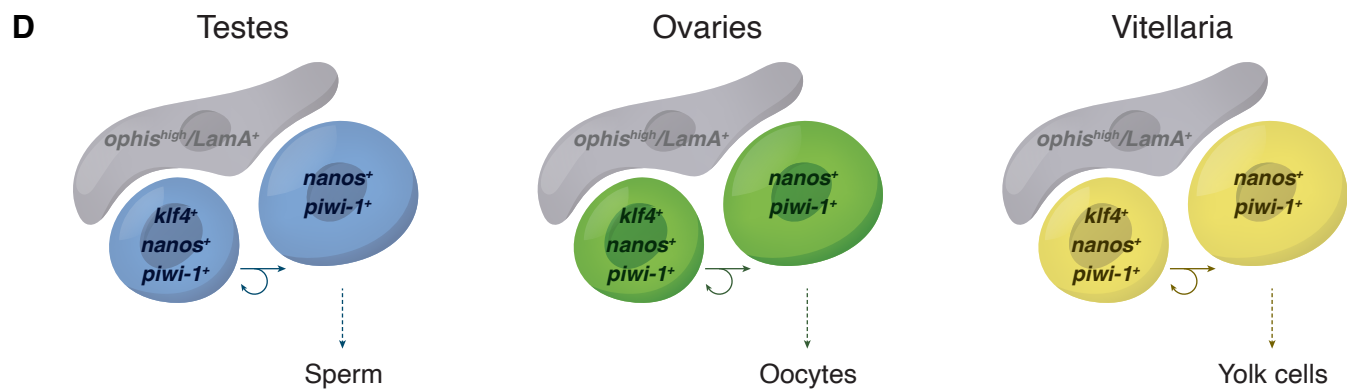

**S1 Fig.**

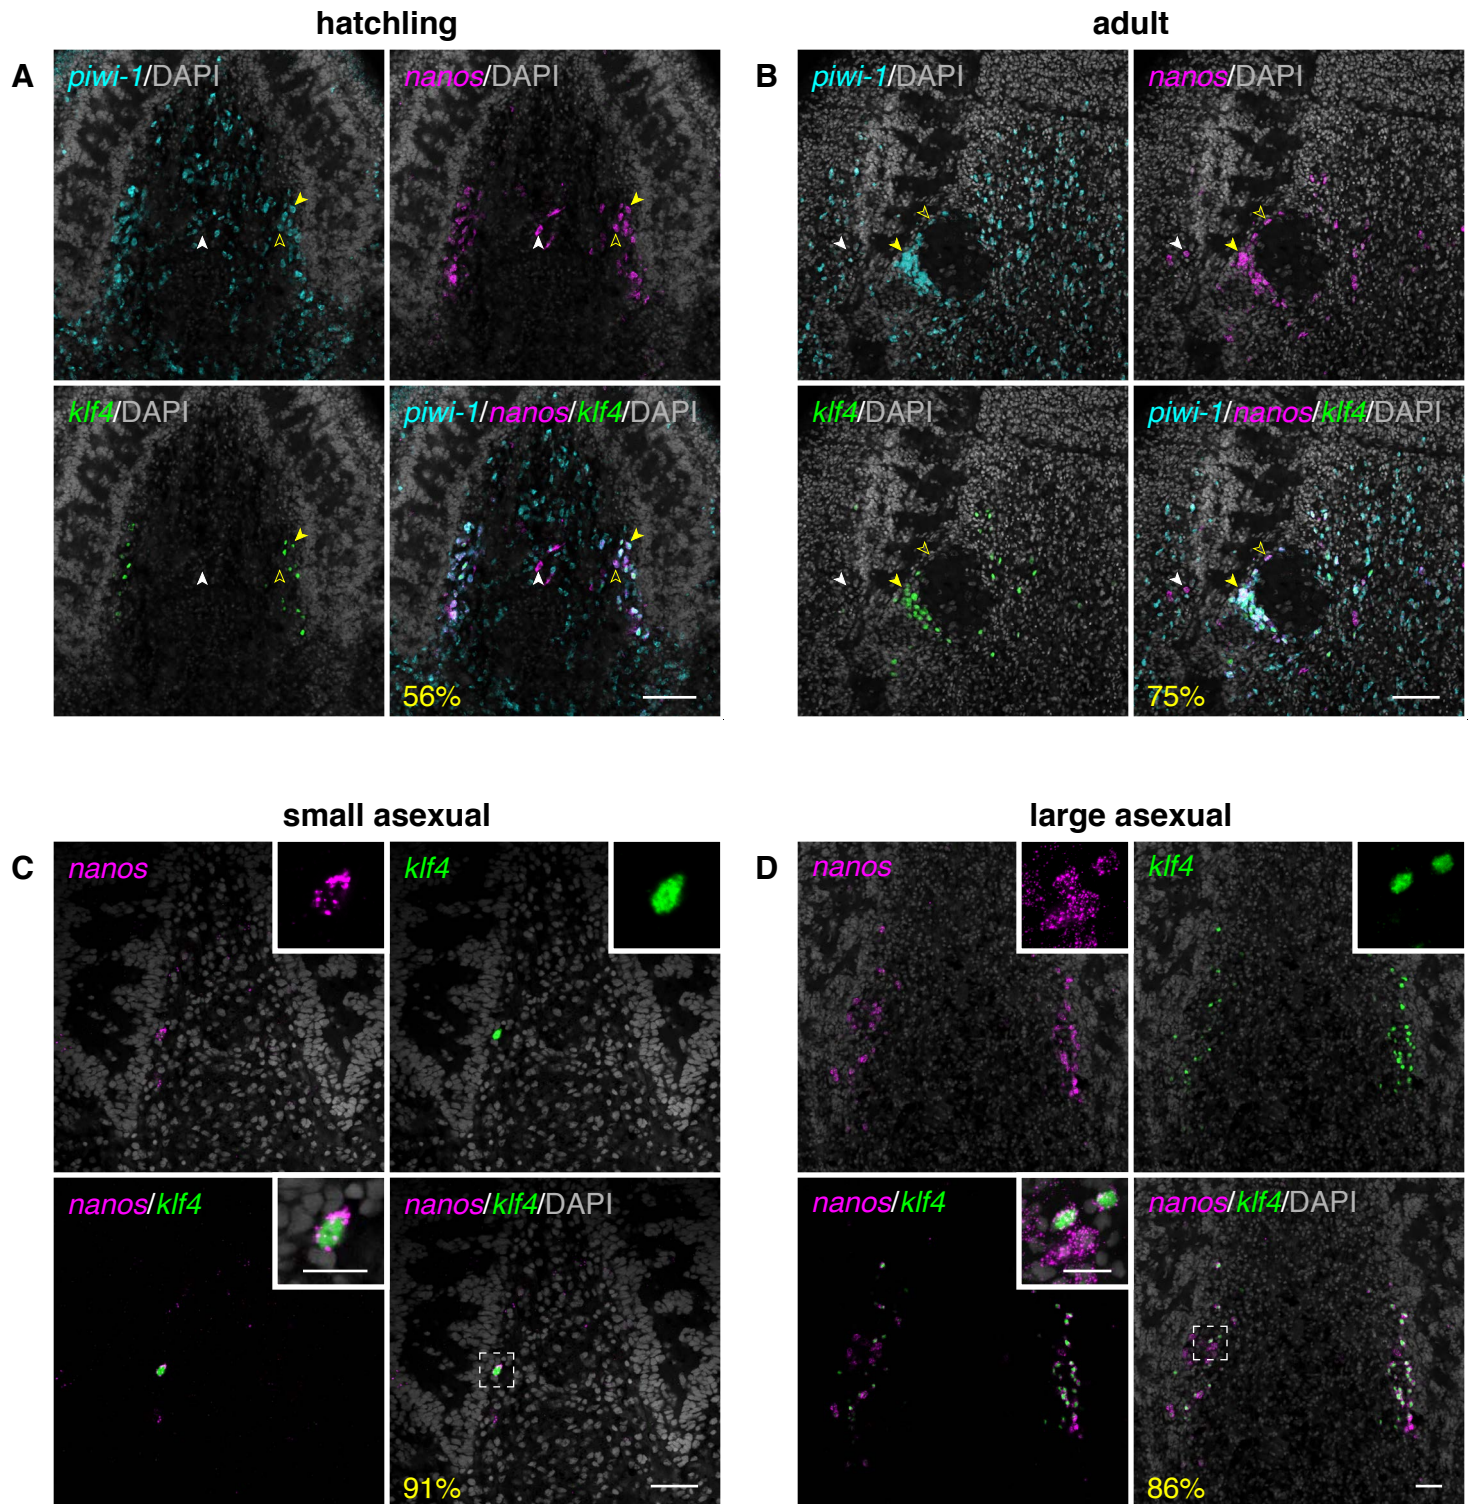

**S2 Fig.**

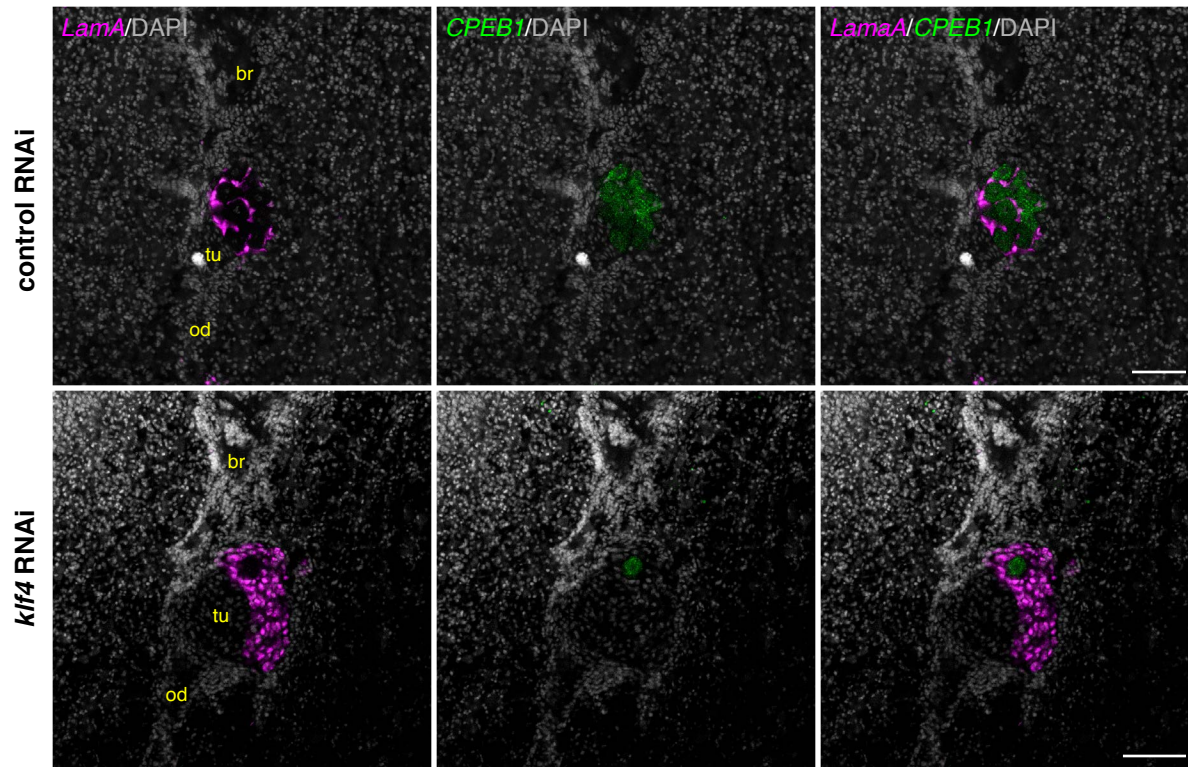



S3 Fig.

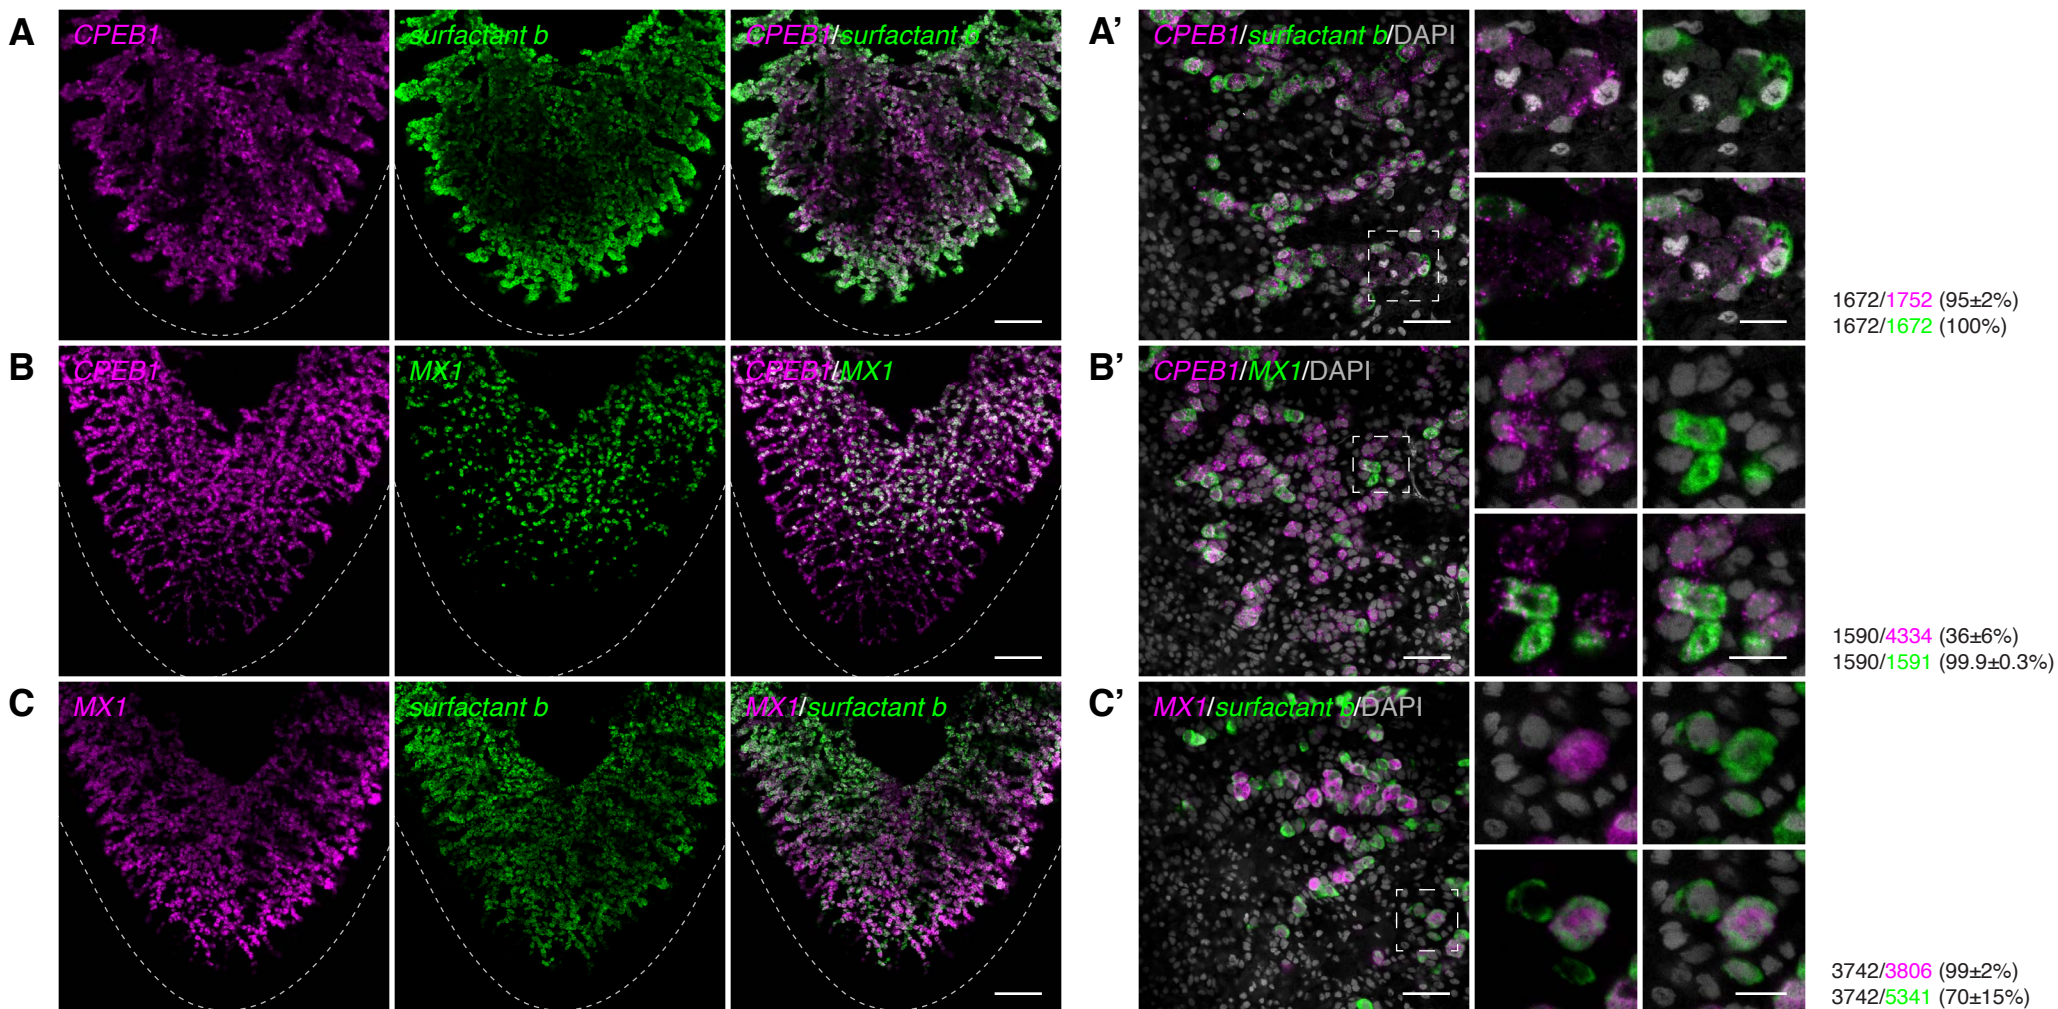

## A. Hatchling

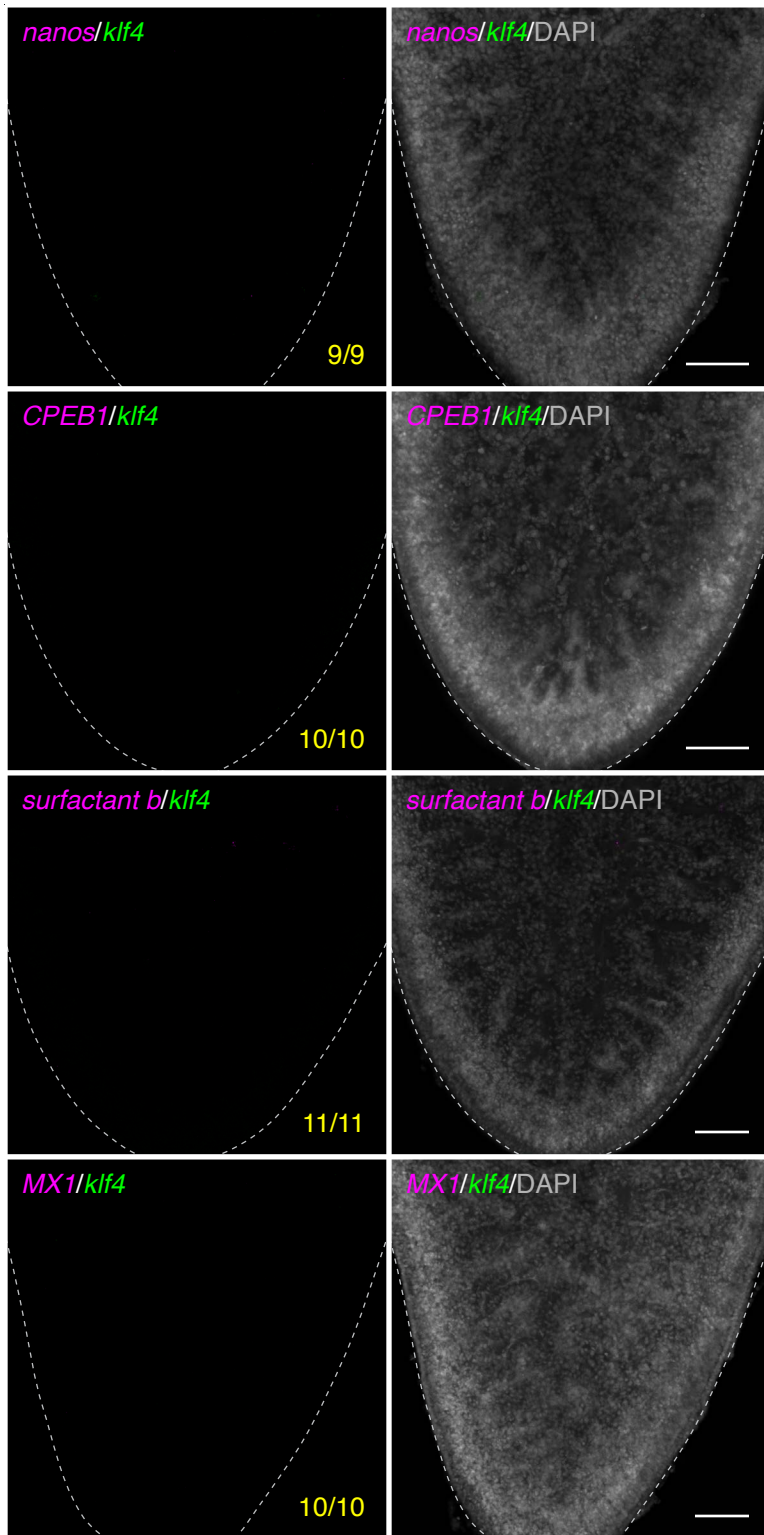

## B. Juvenile

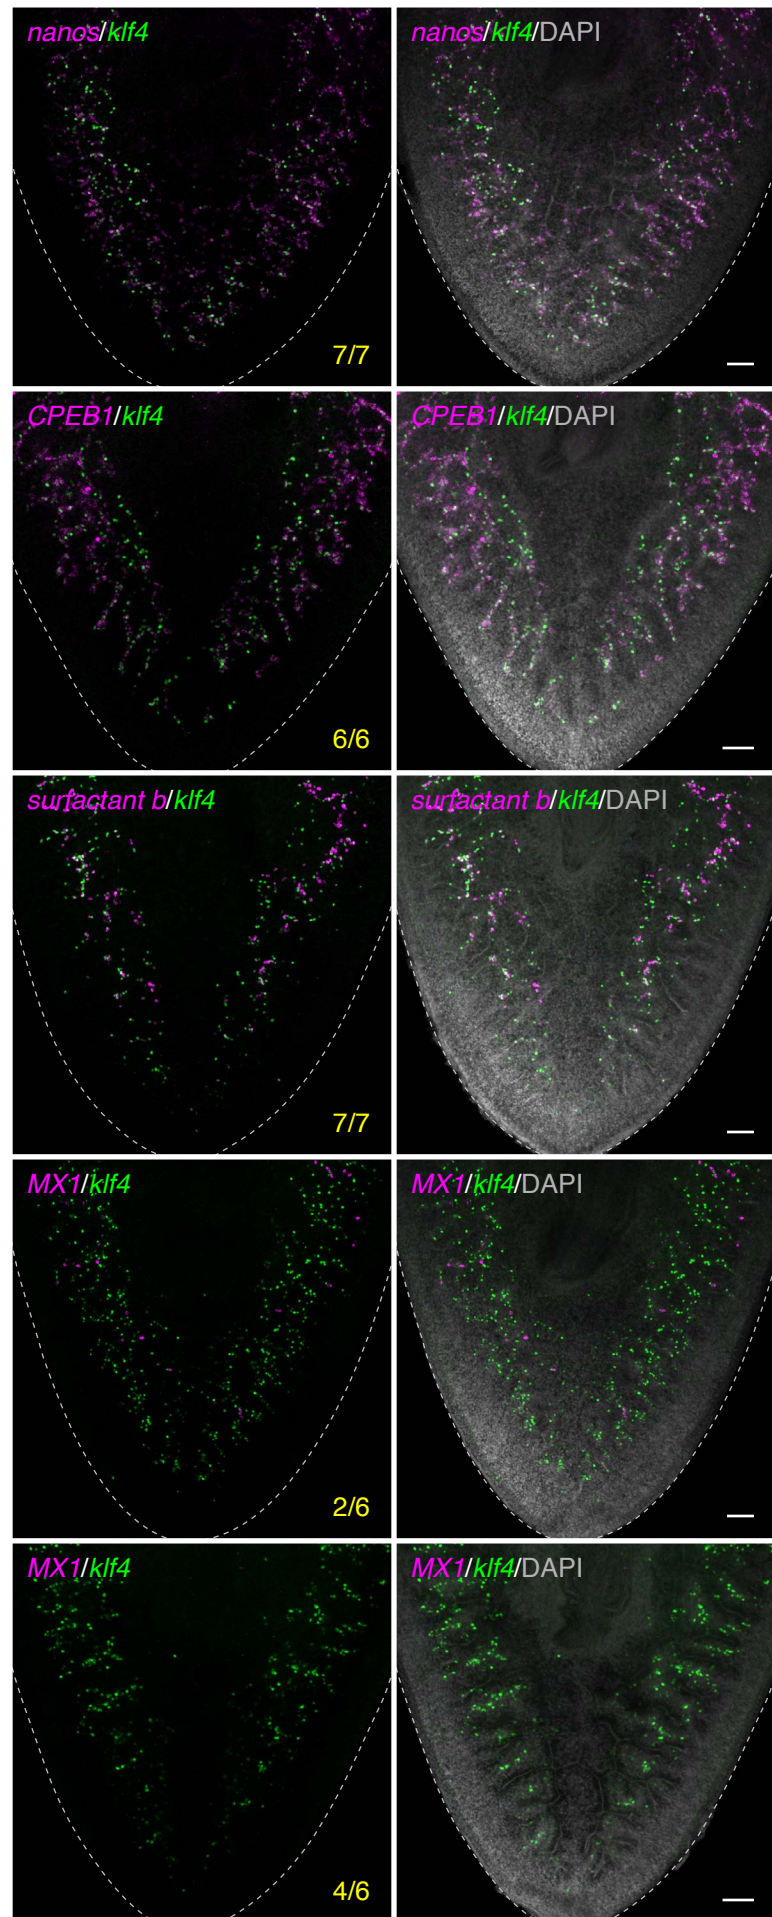

S5 Fig.

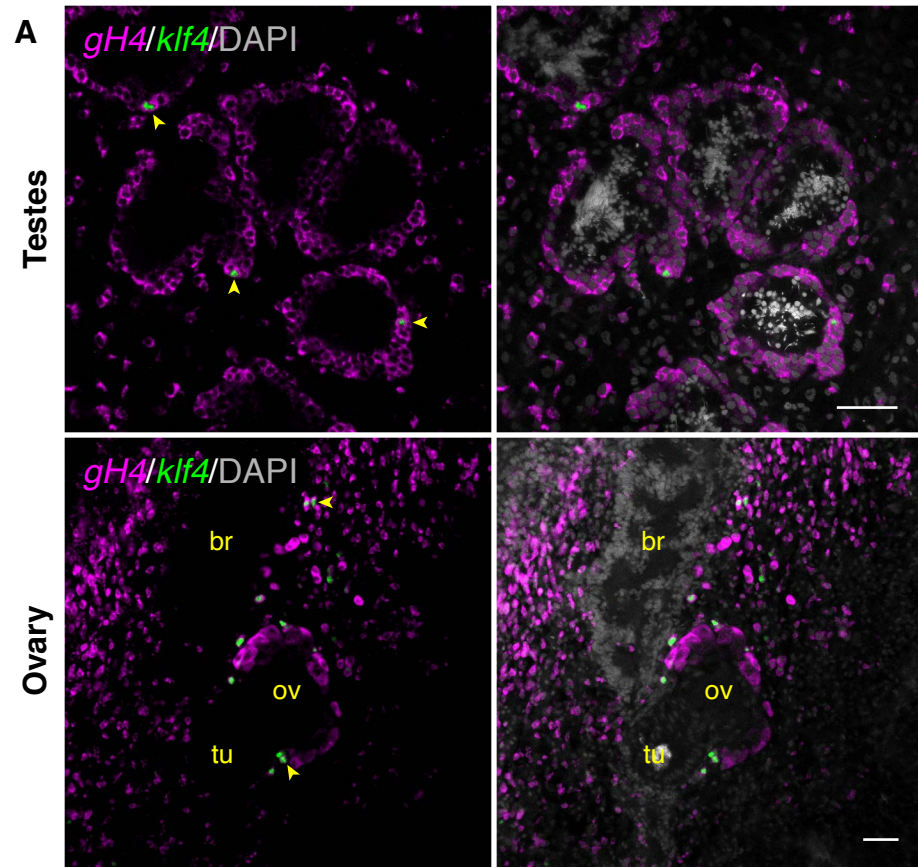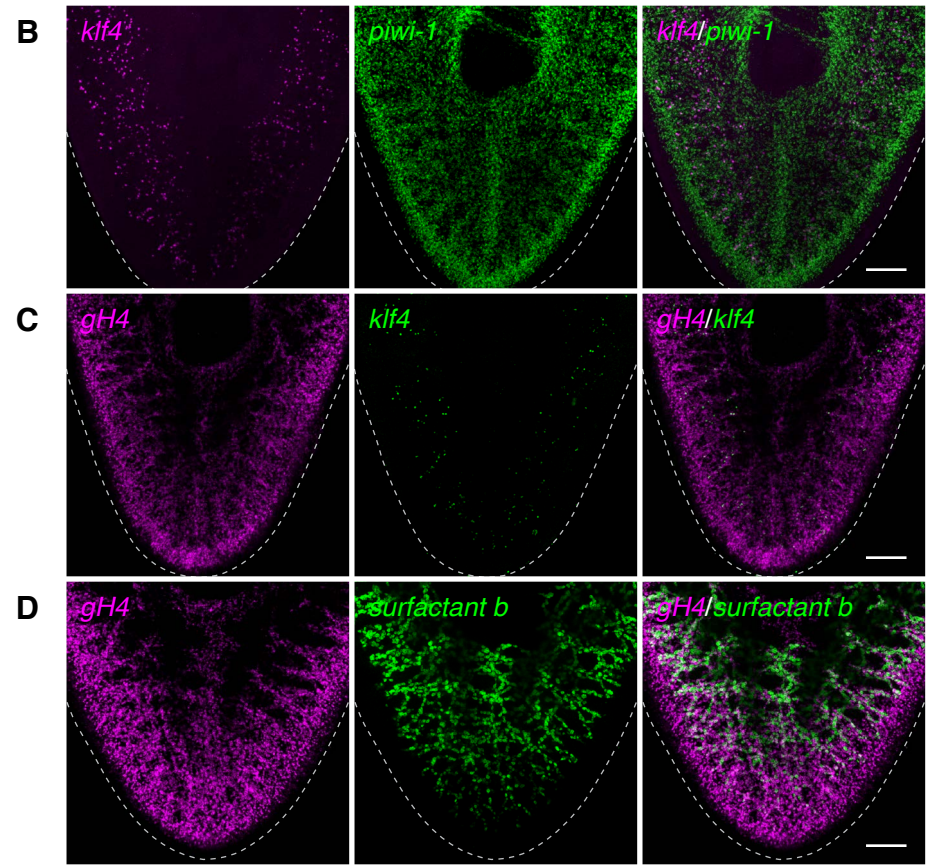

S6 Fig.

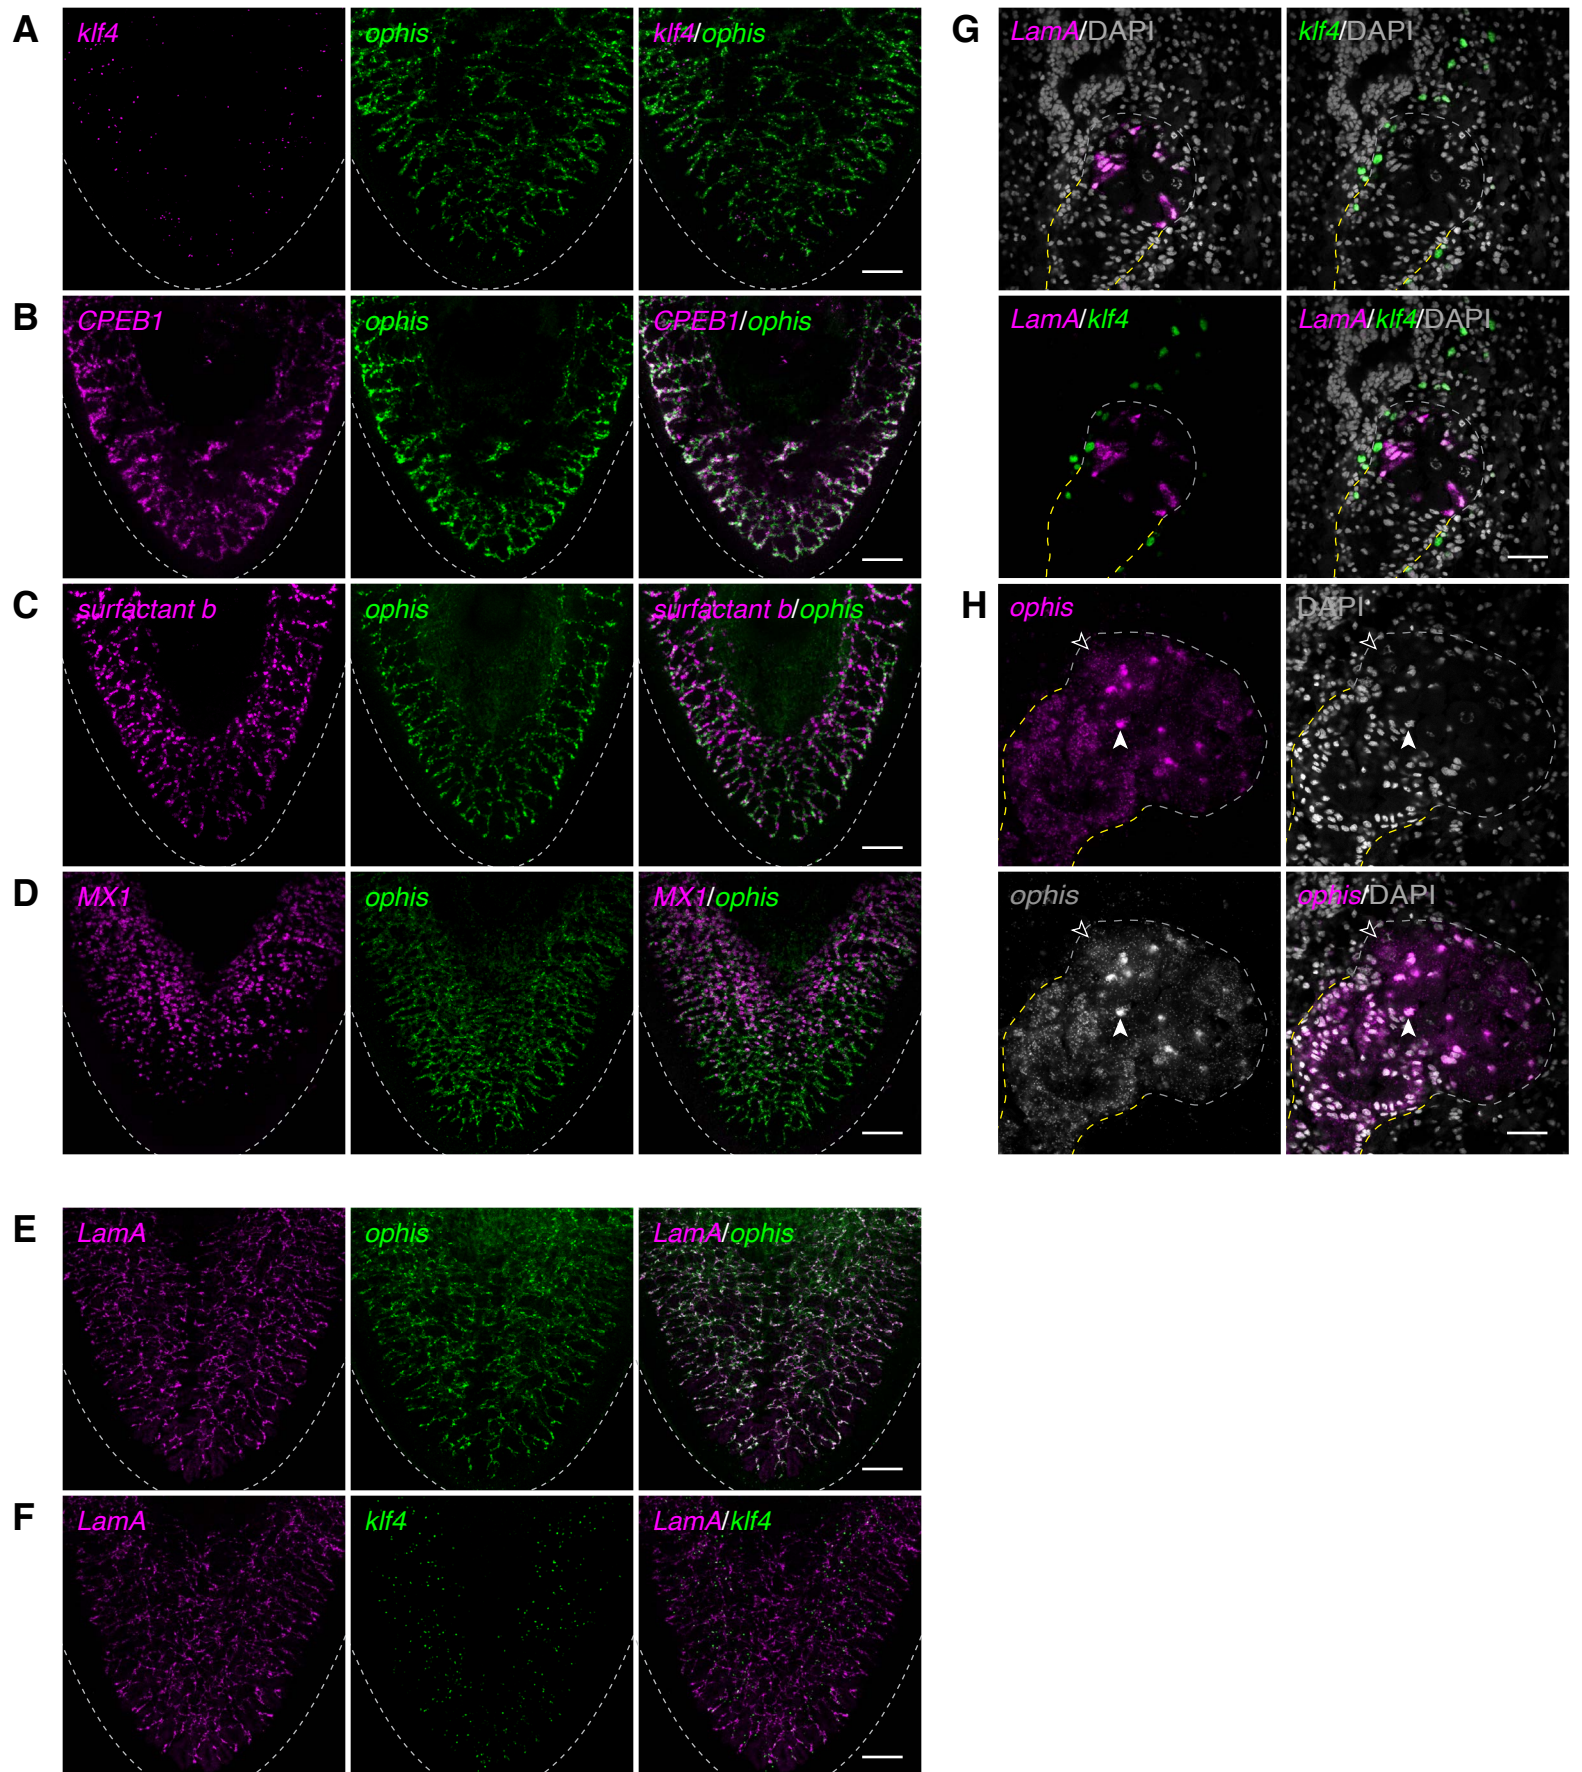

Source: https://www.biorxiv.org/content/10.1101/2021.11.08.467675v1.full.pdf
